# Supplementary material for: Mechanical properties, degree of sclerotisation and elemental composition of the gastric mill in the red swamp crayfish Procambarus clarkii (Decapoda, Crustacea)
Source: PubMed Central journal article supplement (PMC9588795; doi:10.1038/s41598-022-22724-w), 2022-10-23
Supplement: 41598_2022_22724_MOESM1_ESM.pdf [file 41598_2022_22724_MOESM1_ESM.pdf]

**Mechanical properties, degree of sclerotisation and elemental composition of the gastric mill in the red swamp crayfish *Procambarus clarkii* (Decapoda, Crustacea)**

**Wencke Krings<sup>1,2,3\*</sup>, Jan-Ole Brütt<sup>1,2</sup>, Stanislav N. Gorb<sup>3</sup>**

<sup>1</sup>Department of Behavioral Biology, Institute of Cell and Systems Biology of Animals, Universität Hamburg, Martin-Luther-King-Platz 3, 20146 Hamburg, Germany

<sup>2</sup>Department of Mammalogy and Paleoanthropology, Leibniz Institute for the Analysis of Biodiversity Change, Martin-Luther-King-Platz 3, 20146 Hamburg, Germany

<sup>3</sup>Department of Functional Morphology and Biomechanics, Zoologisches Institut, Christian-Albrechts-Universität zu Kiel, Am Botanischen Garten 9, 24118 Kiel, Germany

\*corresponding author: [wencke.krings@uni-hamburg.de](mailto:wencke.krings@uni-hamburg.de)

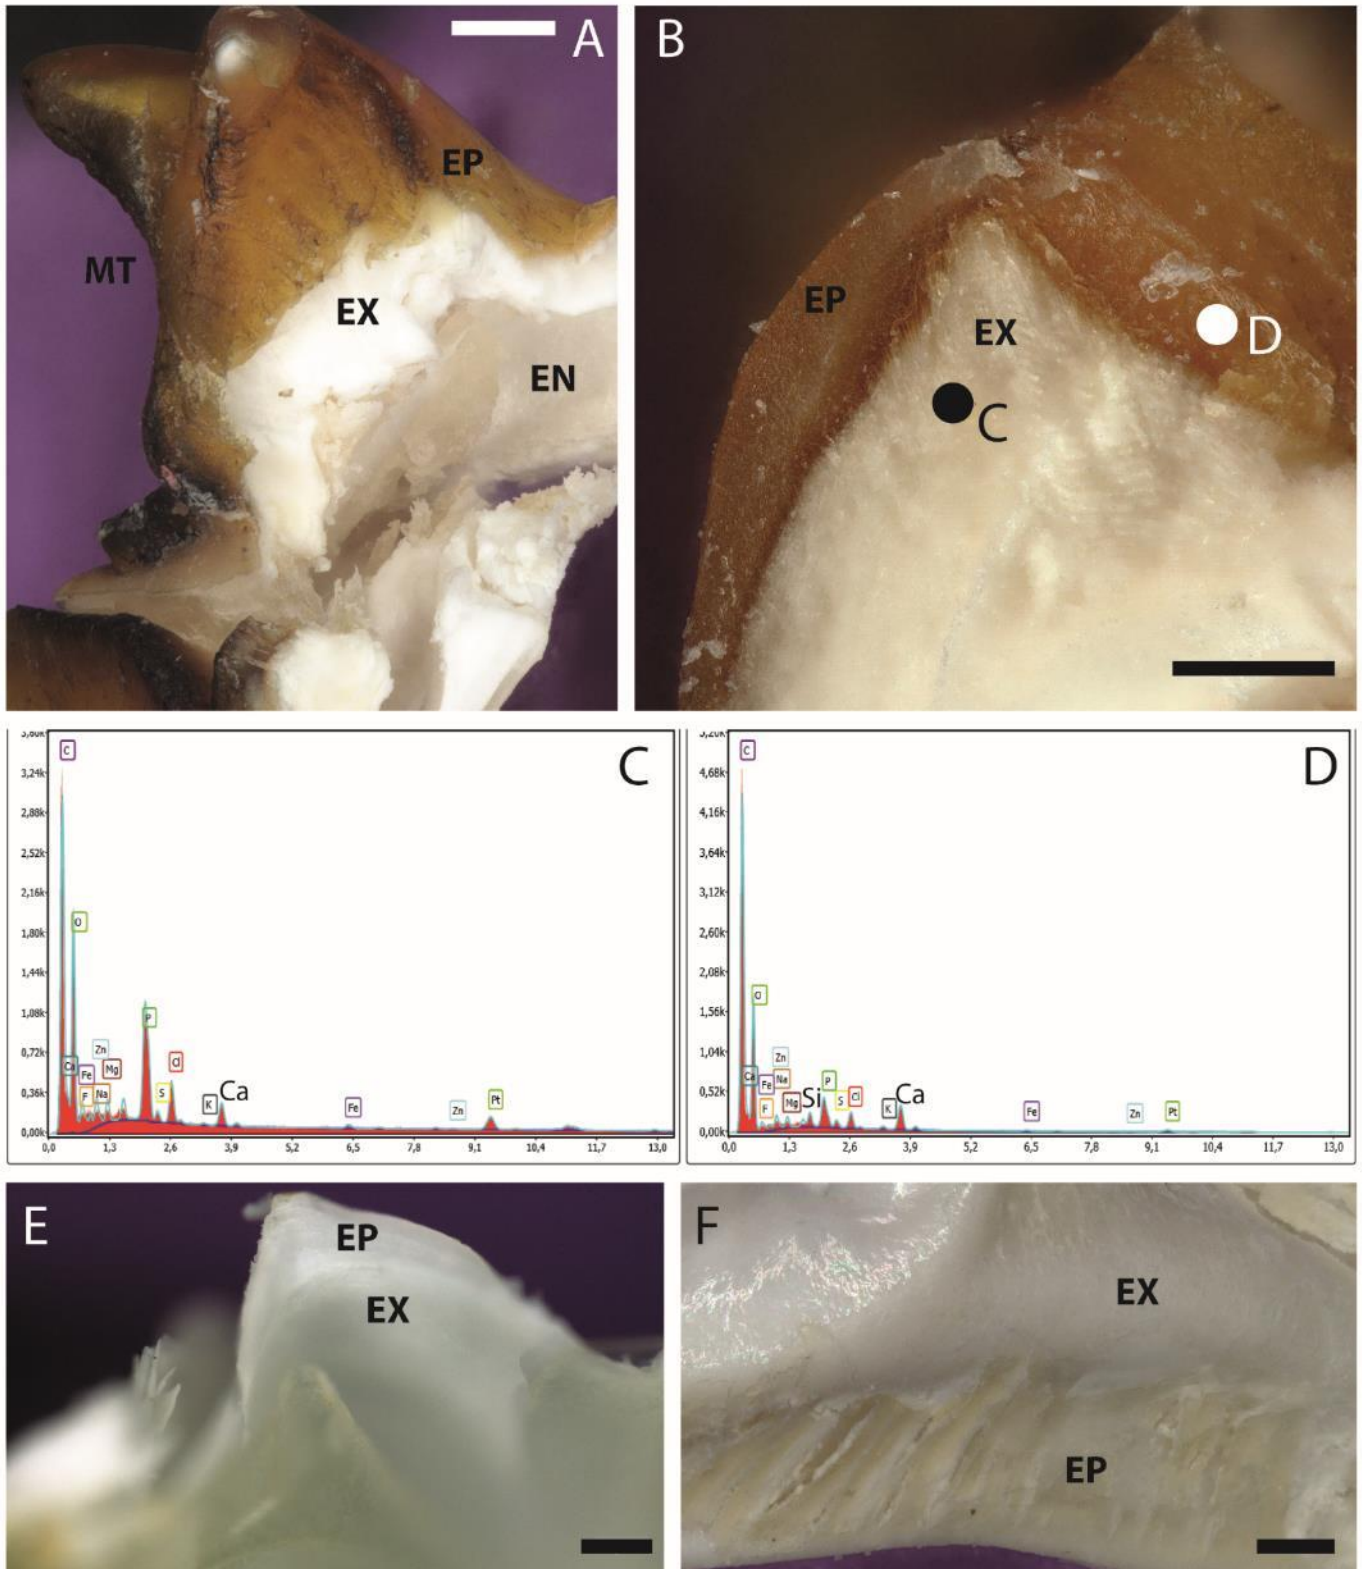

**Supplementary Figure 1.** A–B, E–F. Light microscopy images depicting the layered structure of the cuticle: epicuticle, exocuticle, and endocuticle. A. Medial tooth. B. Broken lateral tooth. C–D. EDX spectra of the exocuticle (C) and epicuticle (D). E. Broken pterocardiac ossicle. F. Broken zygo-cardiac ossicle. Abbreviations: EN, endocuticle; EP, epicuticle; EX, exocuticle; LT, lateral tooth; MT, medial tooth; PtO, pterocardiac ossicle; ZO, zygo-cardiac ossicle. Scale bars: A, 200  $\mu$ m; B, 100  $\mu$ m; E–F, 200  $\mu$ m.

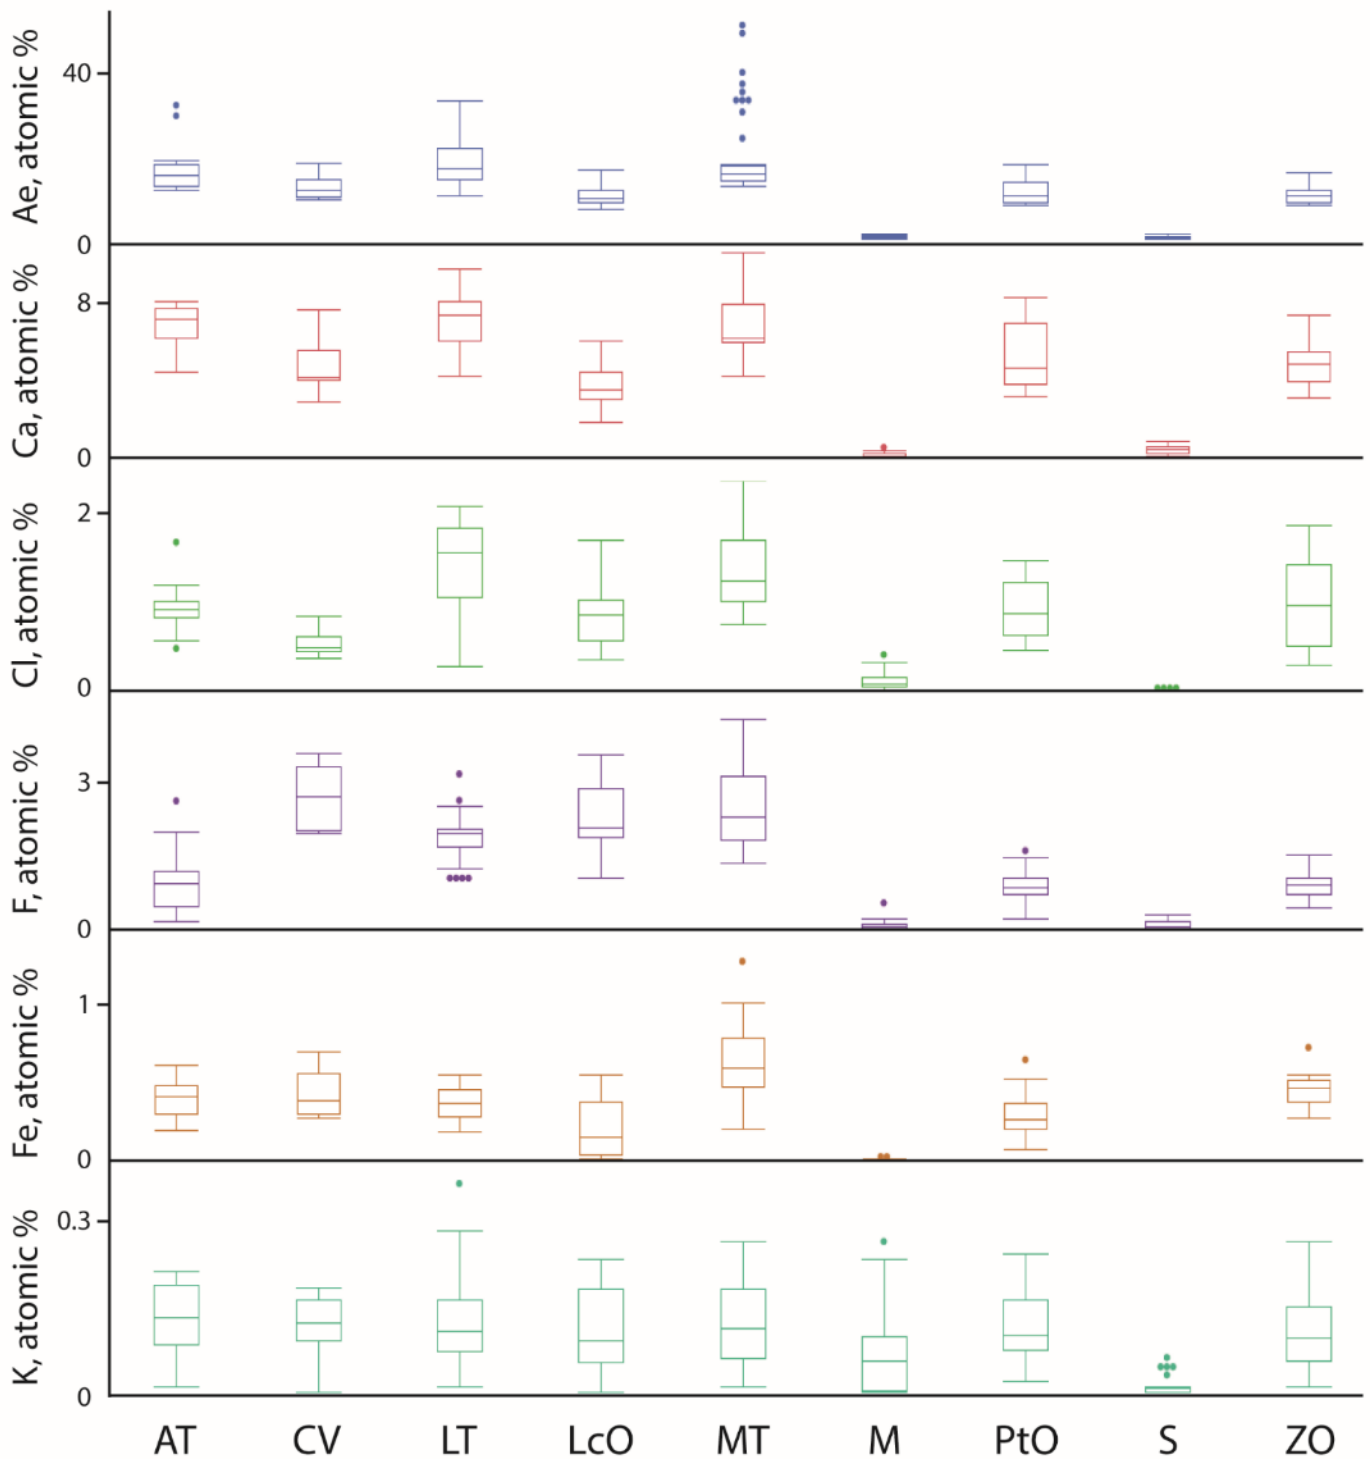

**Supplementary Figure 2.** The results of elemental analysis (EDX) of different structures tested (AT, CV, LcO, LT, MT, M, PtO, S, ZO) (for exact values, see Supplementary Table 2). The elemental proportions of Ae, Ca, Cl, F, Fe, and K are presented in atomic %. Abbreviations: Ae, all elements; AT, accessory tooth; CV, cardiopyloric valve; LcO, lateral cardiac ossicle; LT, lateral tooth; MT, medial tooth; M, membrane; PtO, pterocardiac ossicle; S, setae; ZO, zygo-cardiac ossicle.

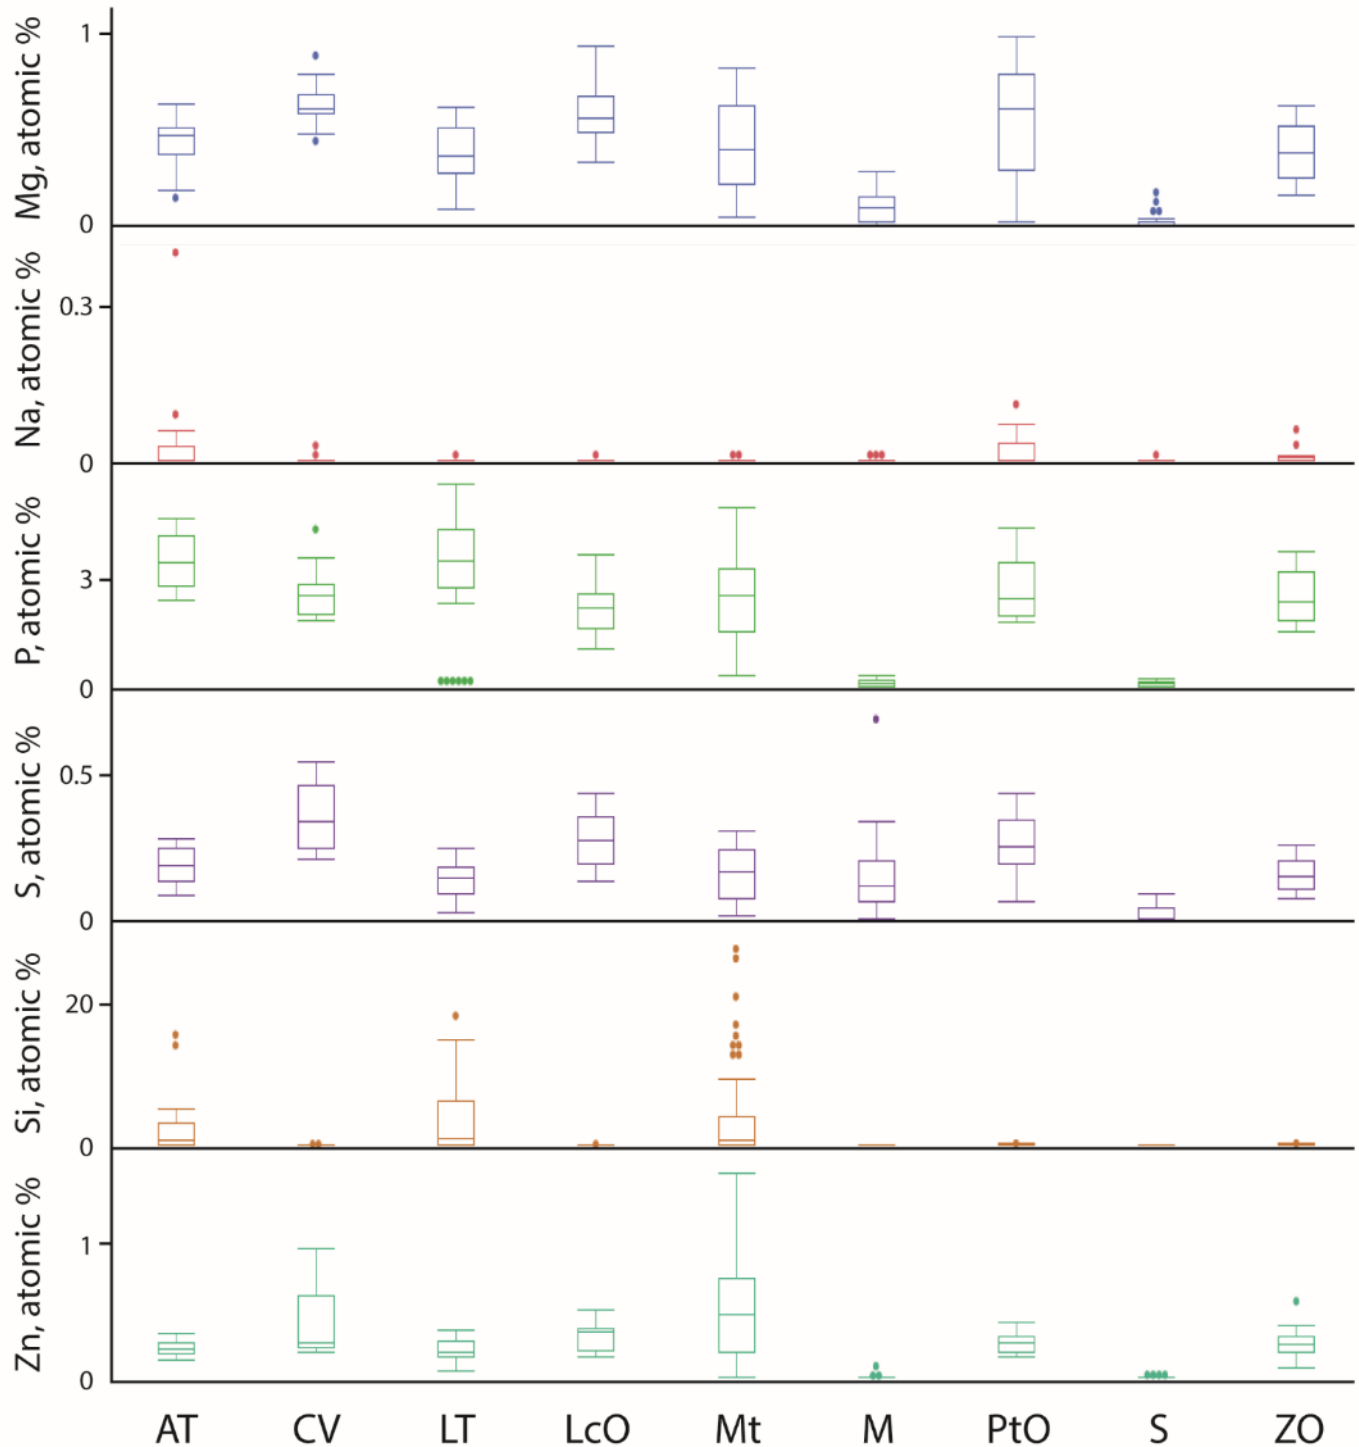

**Supplementary Figure 3.** The results of elemental analysis (EDX) of different structures tested (AT, CV, LcO, LT, MT, M, PtO, S, ZO) (for exact values, see Supplementary Table 2). The elemental proportions Mg, Na, P, S, Si, and Zn are presented in atomic %. Abbreviations: Ae, all elements; AT, accessory tooth; CV, cardiopyloric valve; LcO, lateral cardiac ossicle; LT, lateral tooth; MT, medial tooth; M, membrane; PtO, pterocardiac ossicle; S, setae; ZO, zygo-cardiac ossicle.

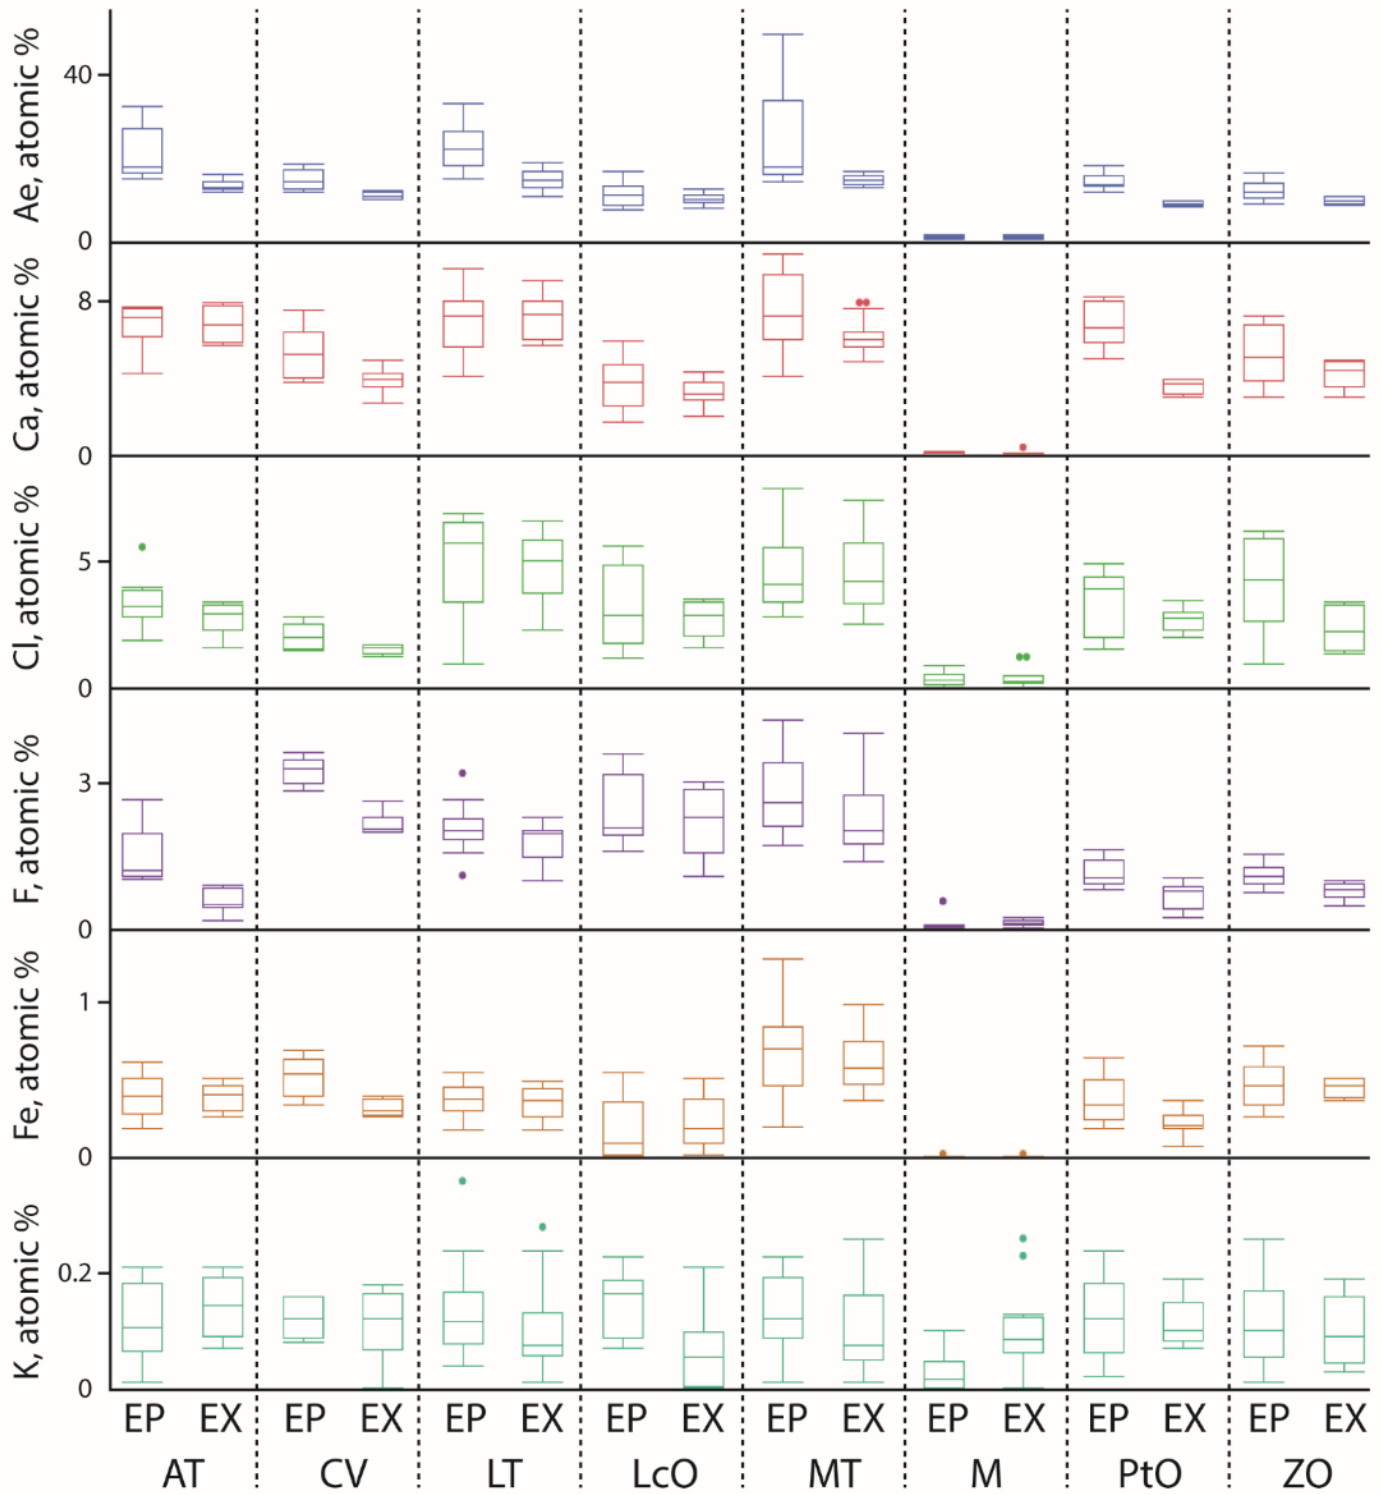

**Supplementary Figure 4.** The results of elemental analysis (EDX) of the epicuticle and exocuticle from different structures tested (AT, CV, LcO, LT, MT, M, PtO, S, ZO) (for exact values, see Table 2). The elemental proportions of Ae, Ca, Cl, F, Fe, and K are presented in atomic %. Abbreviations: Ae, all elements; AT, accessory tooth; CV, cardiopyloric valve; EP, epicuticle; EX, exocuticle; LcO, lateral cardiac ossicle; LT, lateral tooth; MT, medial tooth; M, membrane; PtO, pterocardiac ossicle; S, setae; ZO, zygocardiac ossicle.

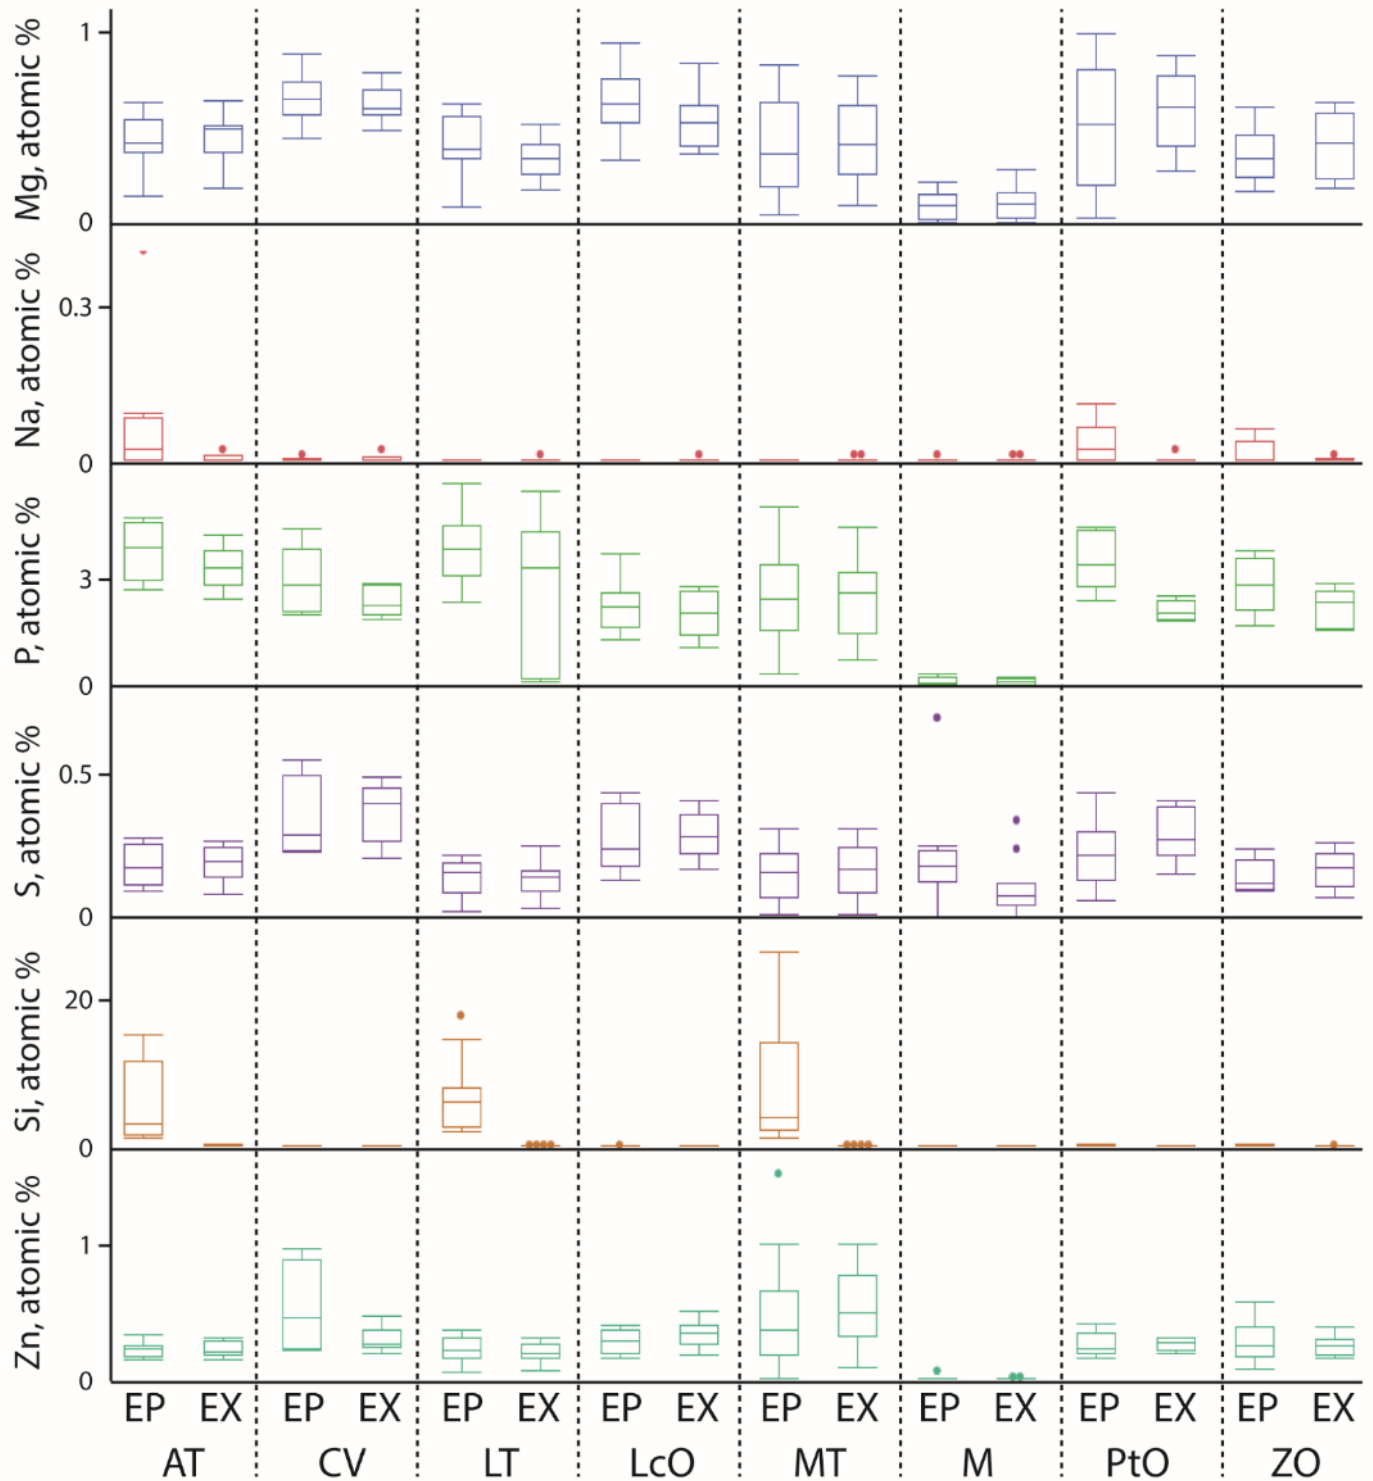

**Supplementary Figure 5.** The results of elemental analysis (EDX) of the epicuticle and exocuticle from different structures tested (AT, CV, LcO, LT, MT, M, PtO, S, ZO) (for exact values, see Table 2). The elemental proportions of Mg, Na, P, S, Si, and Zn are presented in atomic %. Abbreviations: AT, accessory tooth; CV, cardiopyloric valve; EP, epicuticle; EX, exocuticle; LcO, lateral cardiac ossicle; LT, lateral tooth; MT, medial tooth; M, membrane; PtO, pterocardiac ossicle; S, setae; ZO, zygocardiac ossicle.

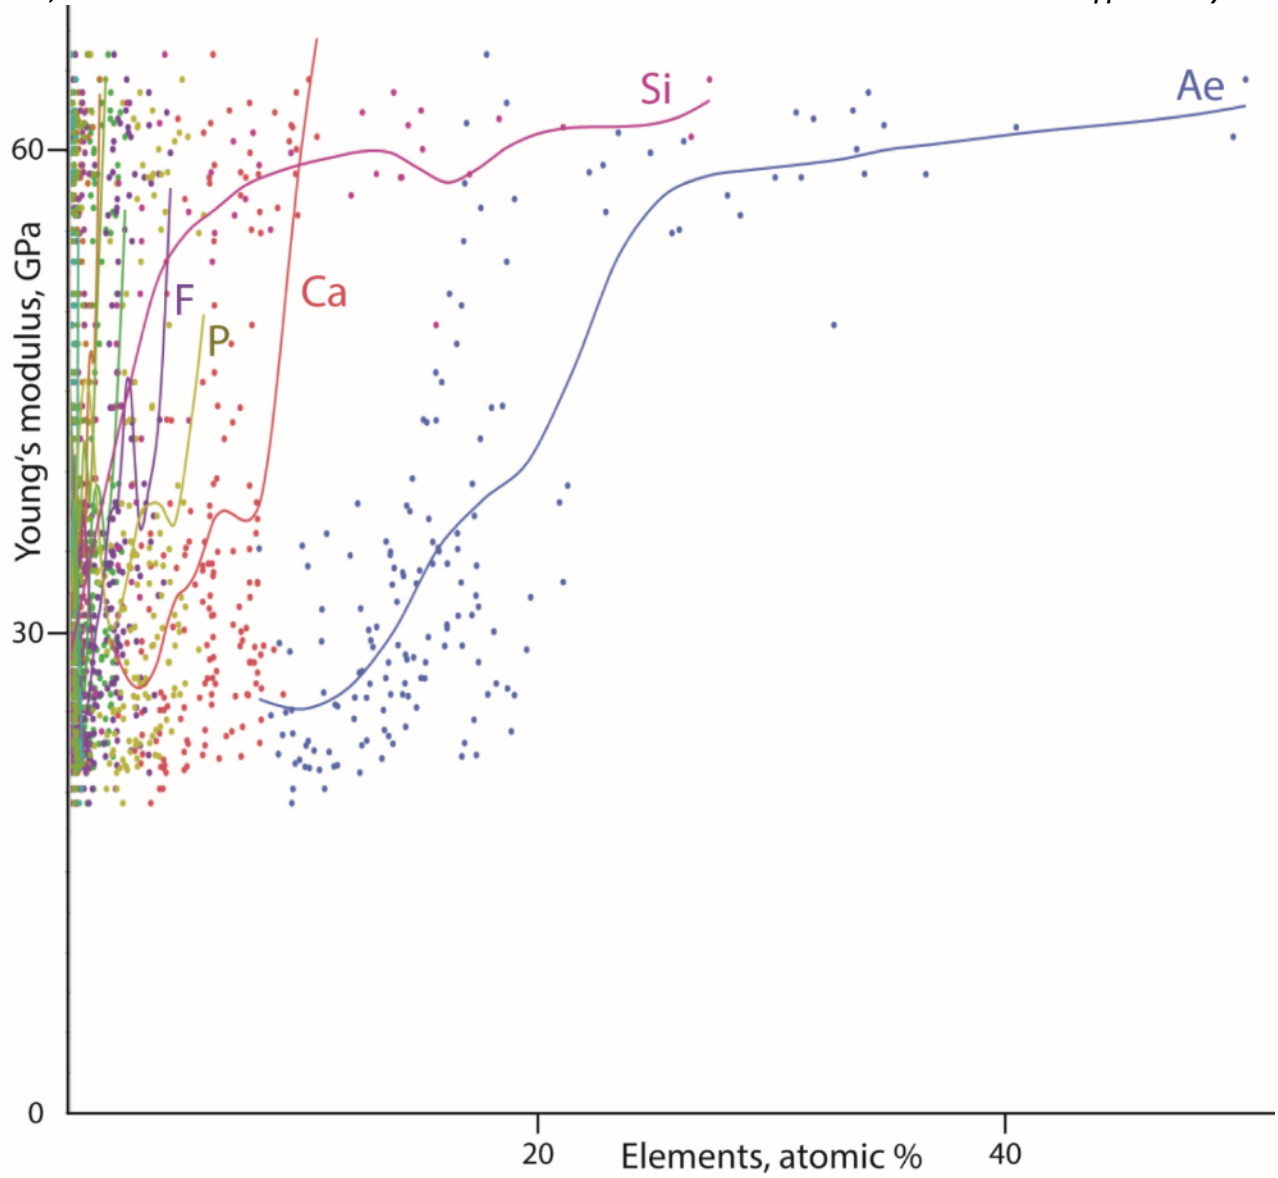

**Supplementary Figure 6.** Relationship between the Young's modulus (GPa), and the proportions (atomic %) of each individual element and all elements (Ae) in general (data from epi- and exocuticle and all structures pooled together). Abbreviations: Ae, all elements.

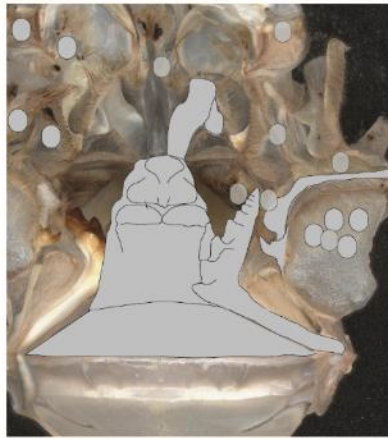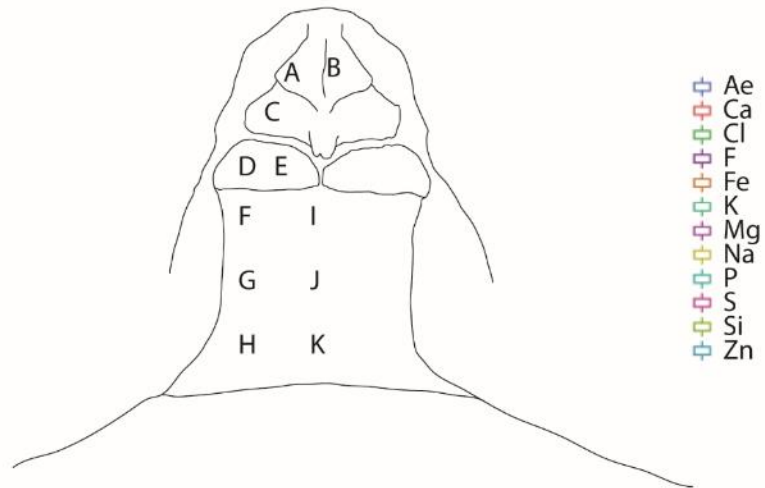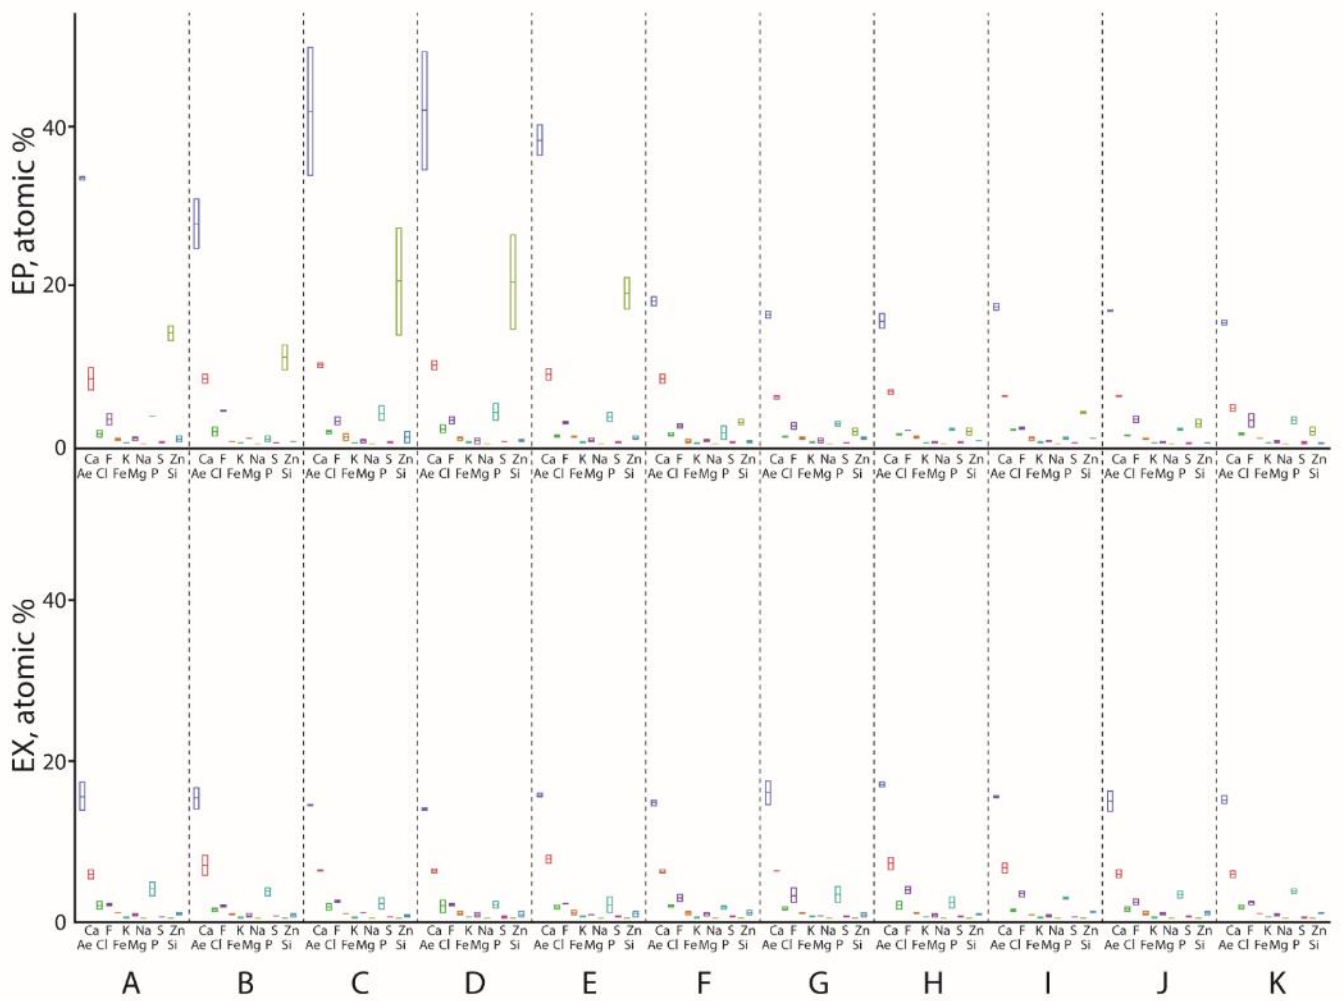

**Supplementary Figure 7.** The medial tooth: the EDX results in atomic % for the epi- and exocuticle (Ae, Ca, Cl, F, Fe, K, Mg, Na, P, S, Si, and Zn content) from the distinct localities tested (A–K). Each locality was tested in two individual stomachs. Abbreviations: Ae, all elements; EP, epicuticle; EX, exocuticle.



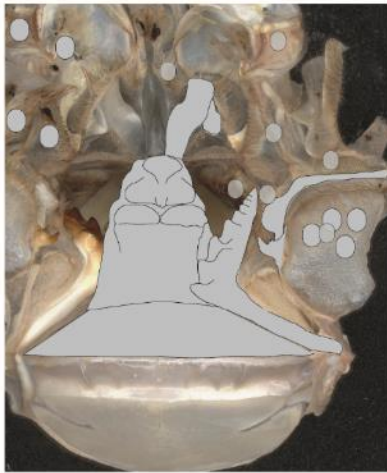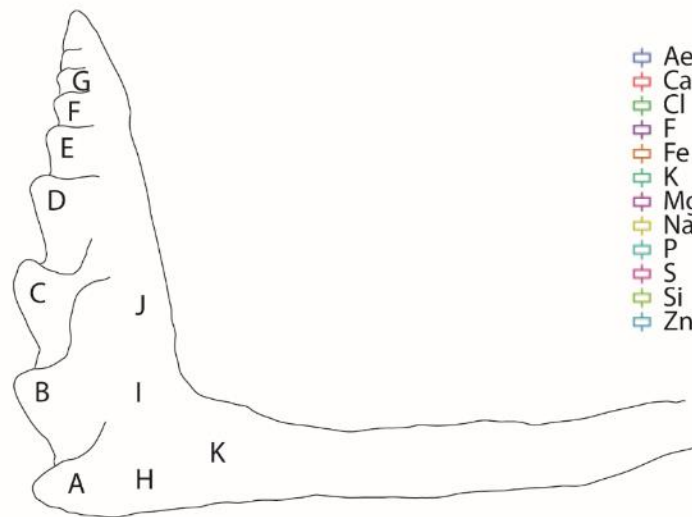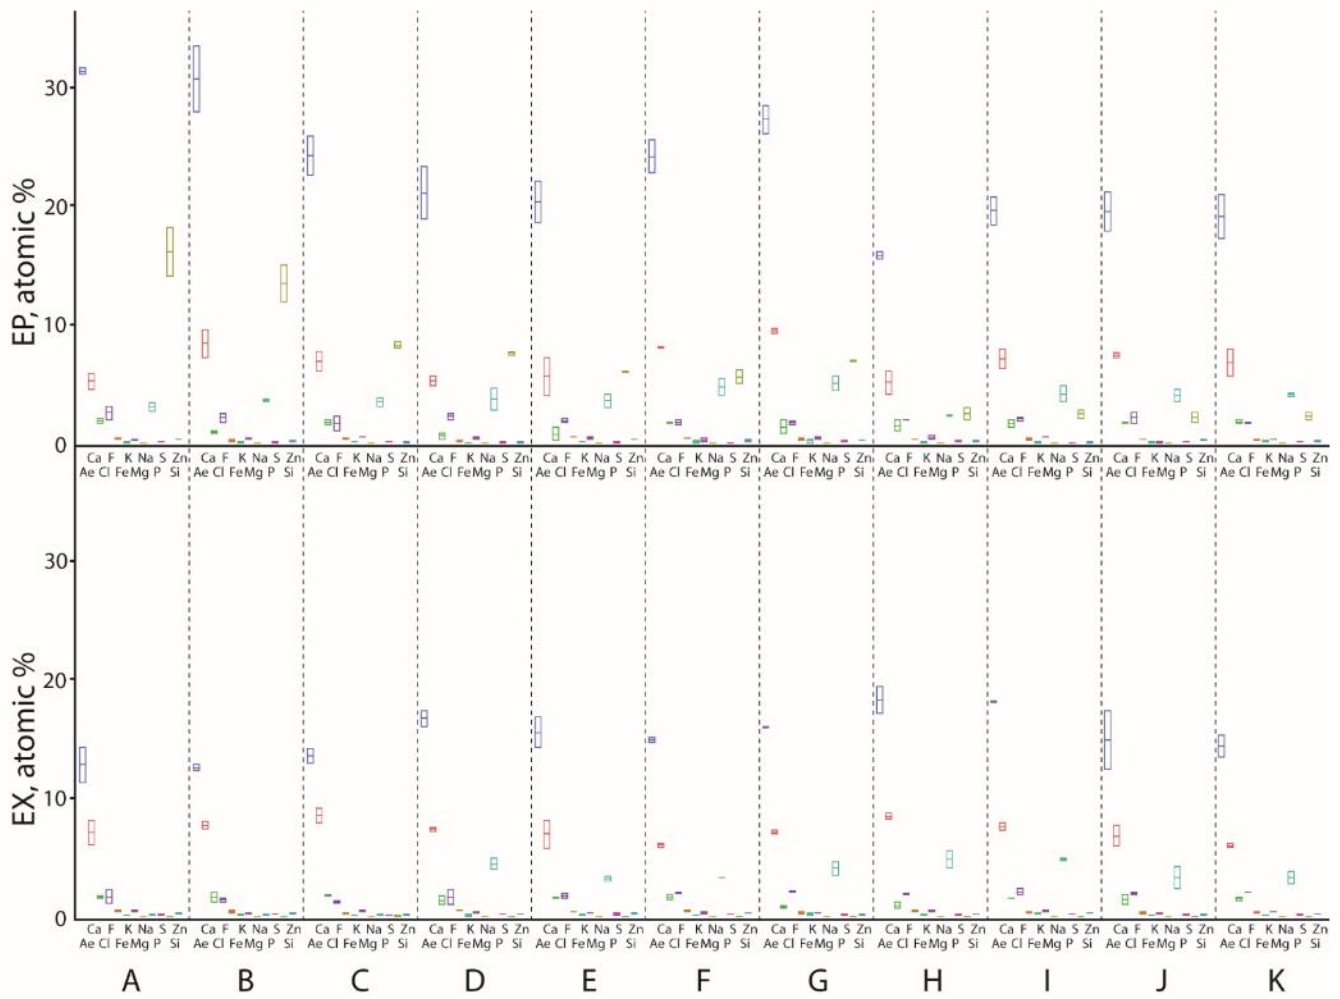

**Supplementary Figure 8.** The lateral tooth: the EDX results in atomic % for the epi- and exocuticle (Ae, Ca, Cl, F, Fe, K, Mg, Na, P, S, Si, and Zn content) from the distinct localities tested (A–K). Each locality was tested in two individual stomachs. Abbreviations: Ae, all elements; EP, epicuticle; EX, exocuticle.

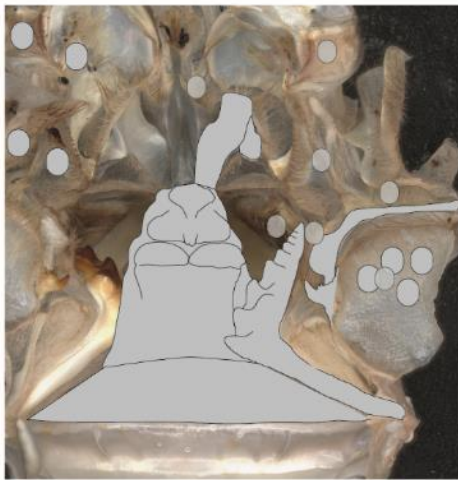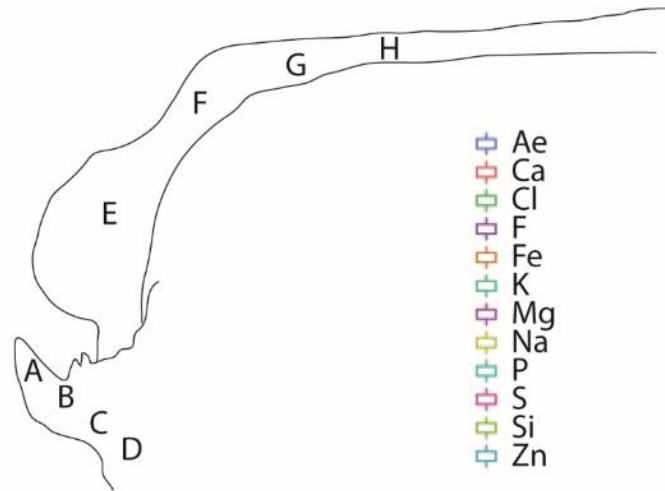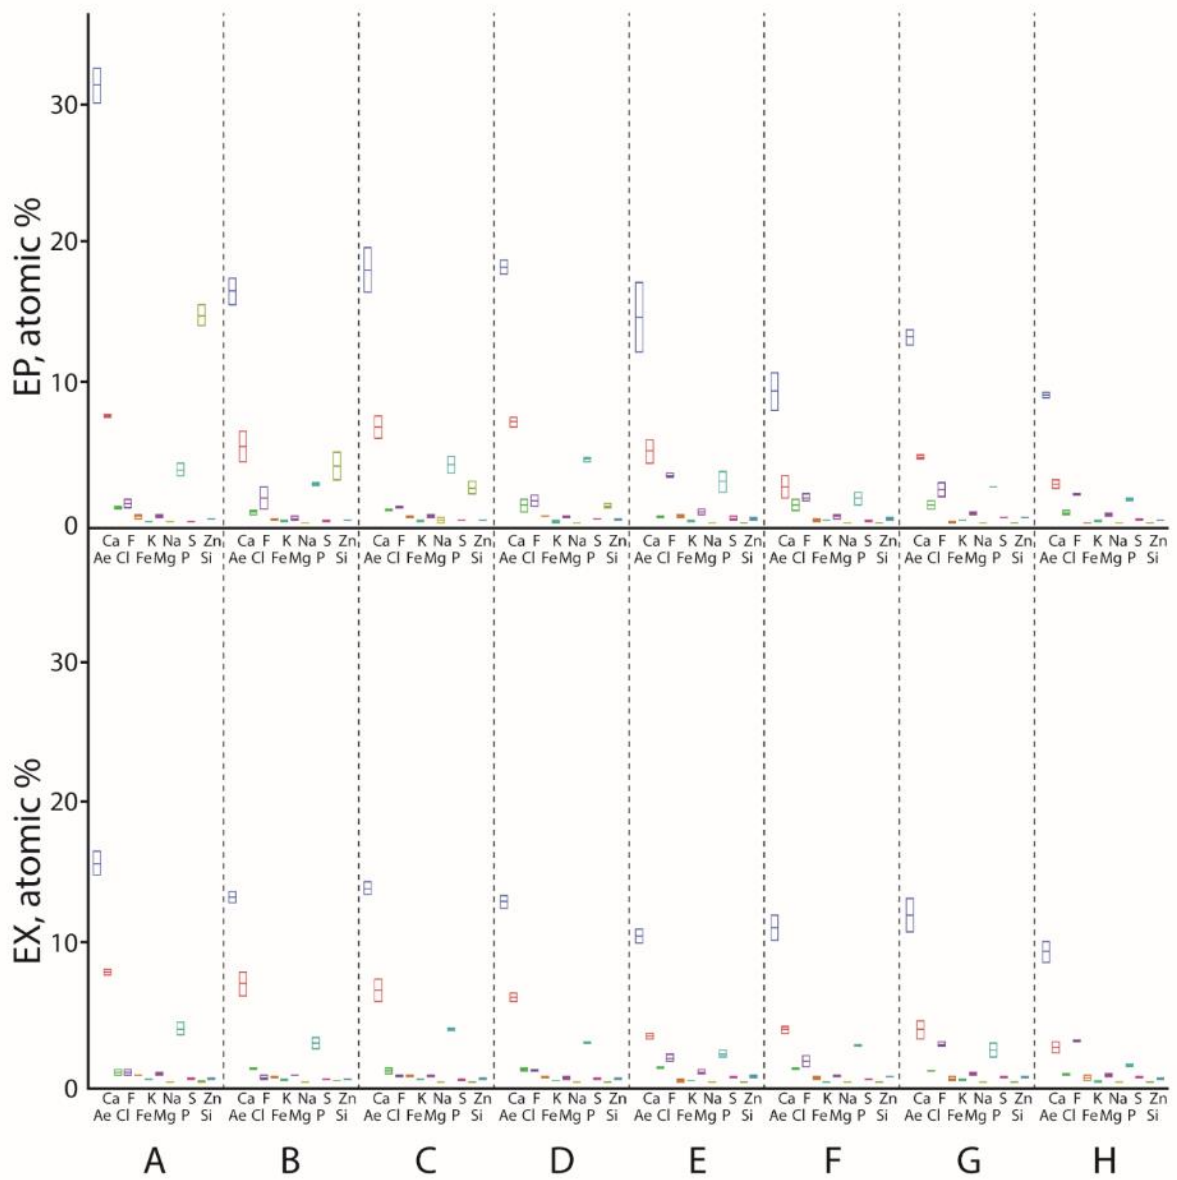

**Supplementary Figure 9.** The accessory tooth (A–D) and the lateral cardiac ossicle (E–H): the EDX results in atomic % for the epi- and exocuticle (Ae, Ca, Cl, F, Fe, K, Mg, Na, P, S, Si, and Zn content) from the distinct localities tested (A–H). Each locality was tested in two individual stomachs. Abbreviations: Ae, all elements; EP, epicuticle; EX, exocuticle.

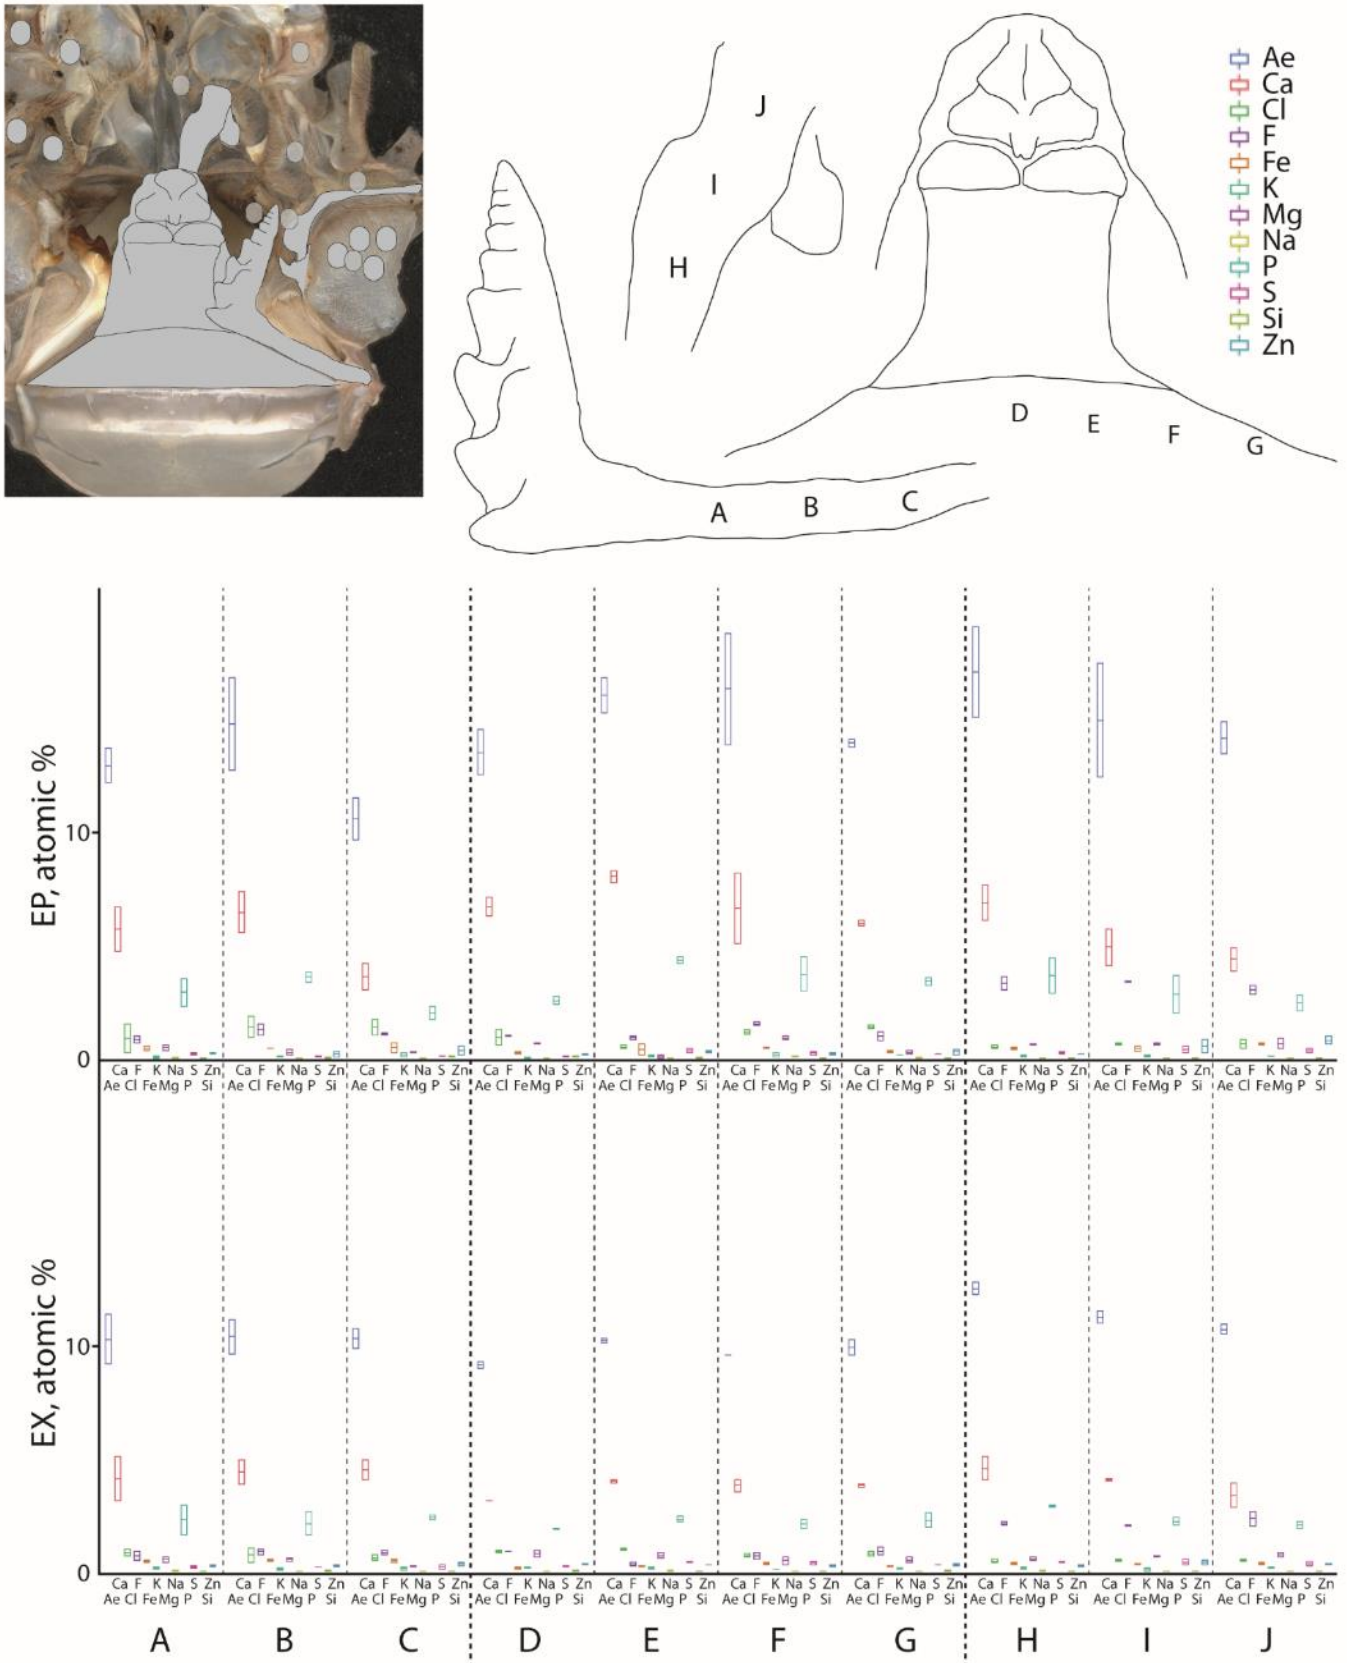

**Supplementary Figure 10.** The zygo-cardiac ossicle (A–C), the pterocardiac ossicle (D–G), and the cardiopyloric valve (H–J): the EDX results in atomic % for the epi- and exocuticle (Ae, Ca, Cl, F, Fe, K, Mg, Na, P, S, Si, and Zn content) from the distinct localities tested (A–J). Each locality was tested in two individual stomachs. Abbreviations: Ae, all elements; EP, epicuticle; EX, exocuticle.





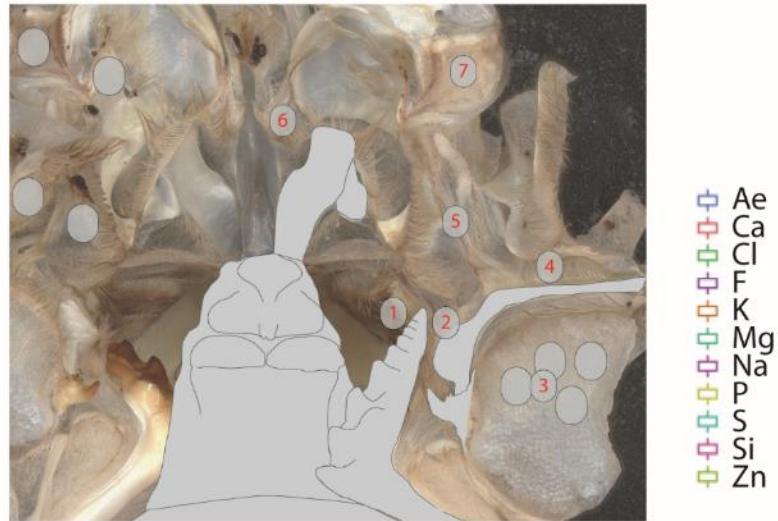

Setae

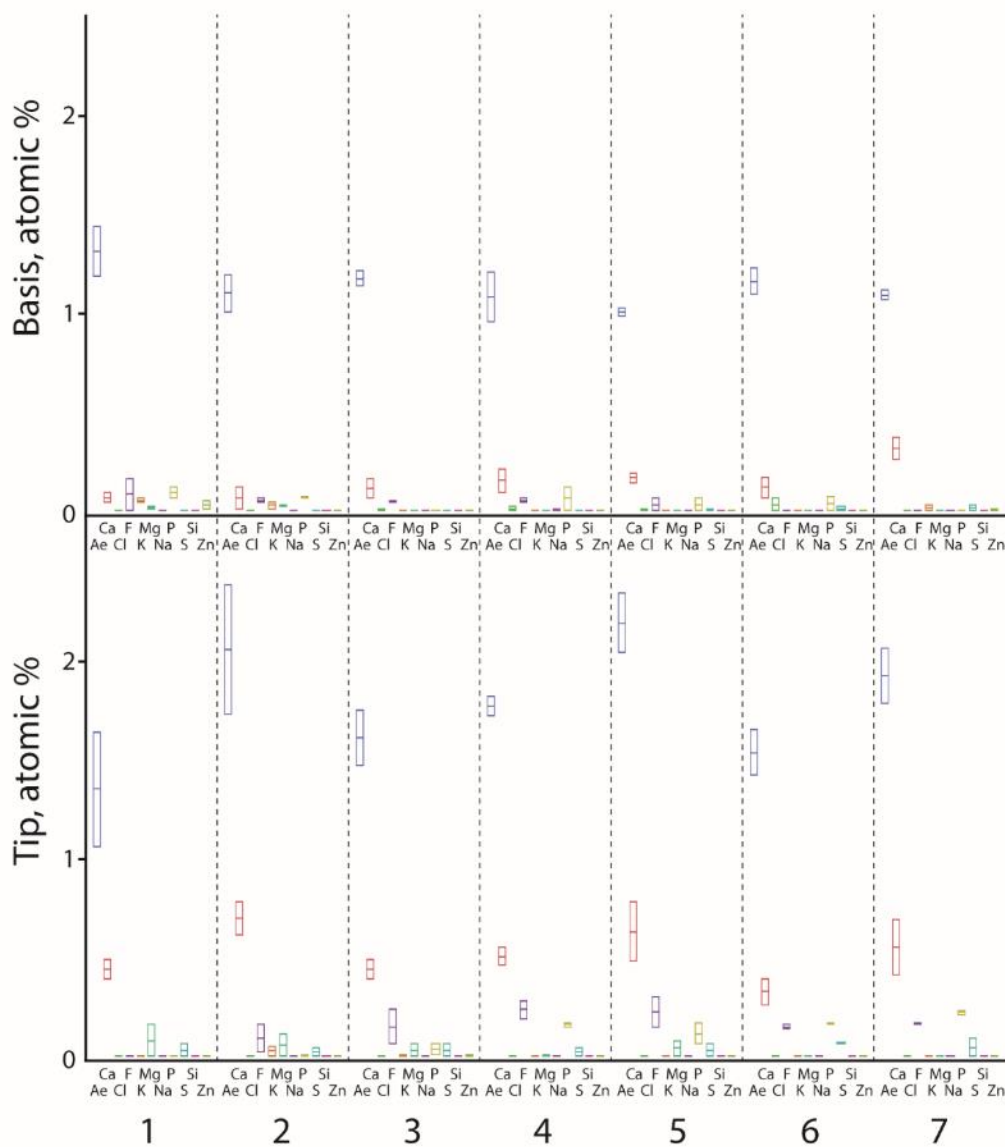

**Supplementary Figure 12.** The setae: the EDX results in atomic % (Ae, Ca, Cl, F, Fe, K, Mg, Na, P, S, Si, and Zn content) from the distinct localities of the tip and basis (1–7). Each locality was tested in two individual stomachs. Abbreviations: Ae, all elements.

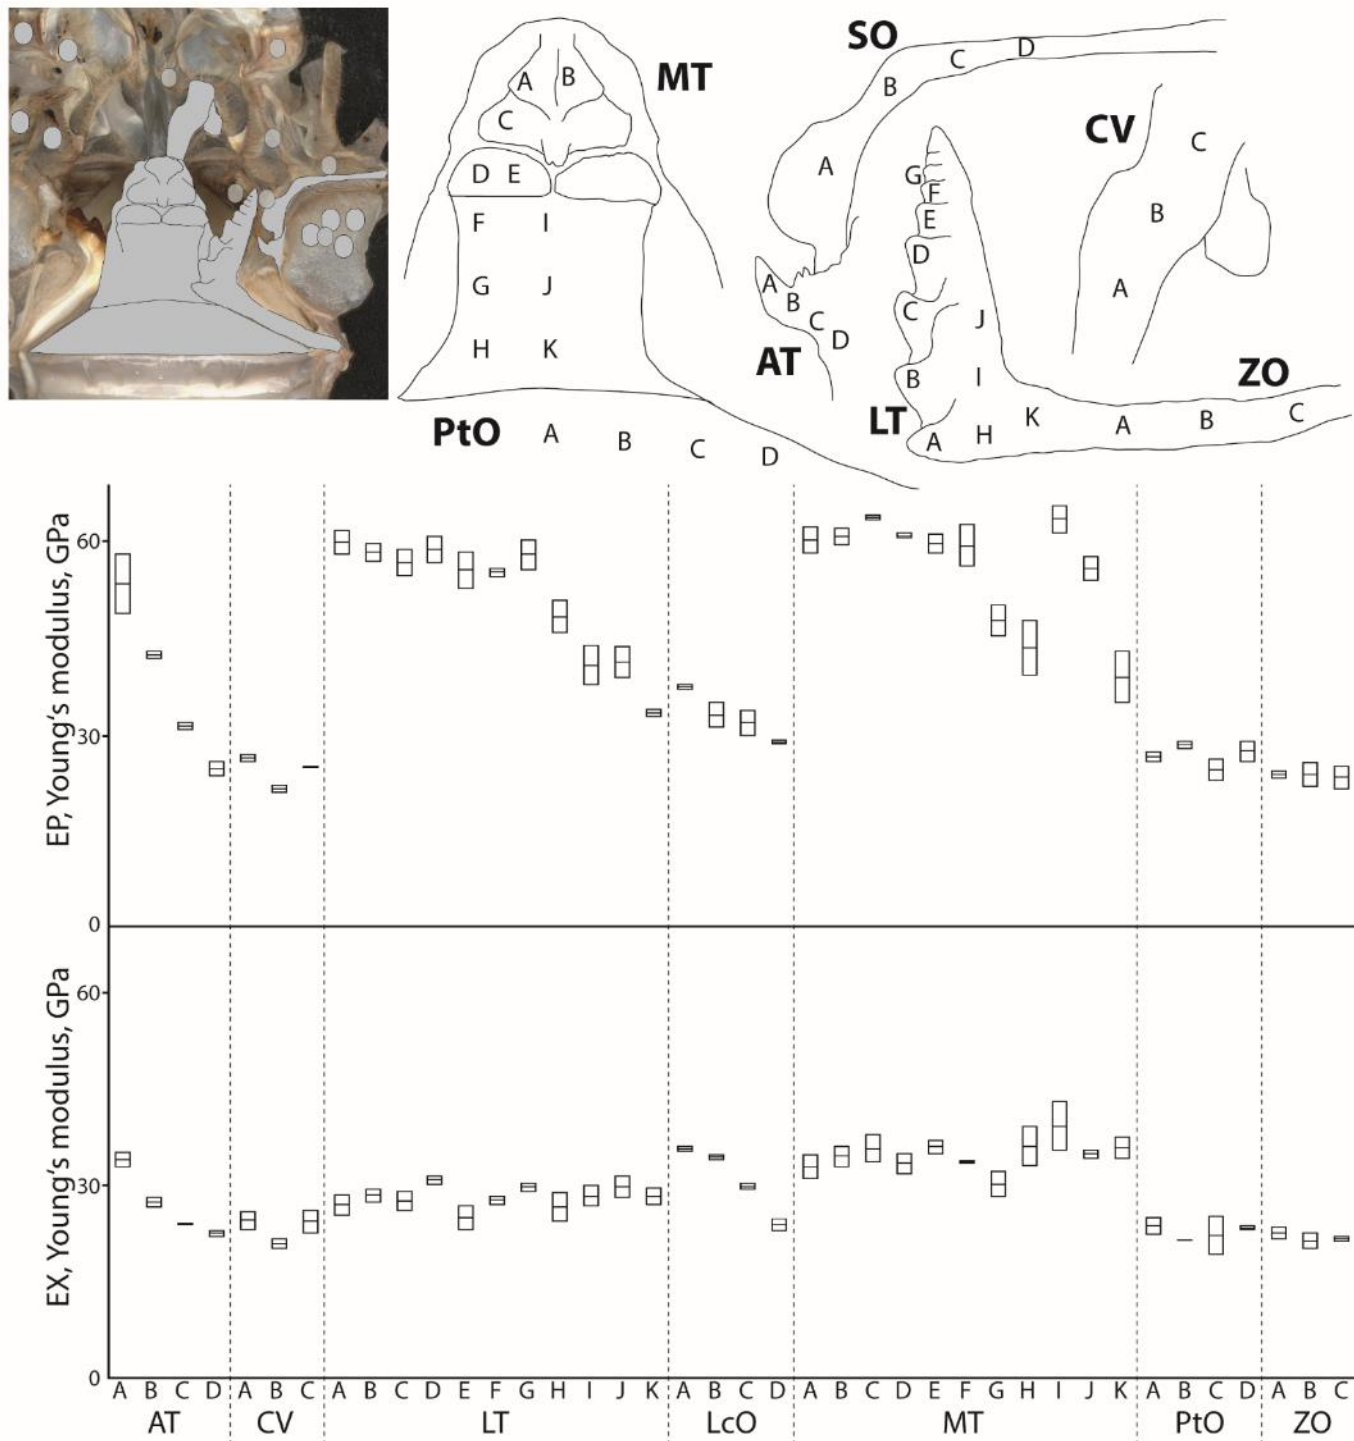

**Supplementary Figure 13.** The results of nanoindentation (Young’s modulus, given in GPa) of the epi- and exocuticle from individual structures (AT, CV, LcO, LT, MT, PtO, ZO) at different localities. Abbreviations: AT, accessory tooth; CV, cardiopyloric valve; EP, epicuticle; EX, exocuticle; LcO, lateral cardiac ossicle; LT, lateral tooth; MT, medial tooth; PtO, pterocardiac ossicle; ZO, zygo-cardiac ossicle.

**Supplementary Table 1.** The mean and SD of the mechanical properties (H and E, both in GPa) and elemental proportions (in atomic %) for individual structures are listed. Abbreviations: E, Young's modulus; H, hardness; N, quantity of test; SD, standard deviation.

| Structure                    |      | Ae   | Ca  | Cl  | F   | Fe   | H   | K   | Mg  | Na  | P   | S   | Si   | E    | Zn  |
|------------------------------|------|------|-----|-----|-----|------|-----|-----|-----|-----|-----|-----|------|------|-----|
| AT, accessory tooth          | Mean | 17,5 | 6,9 | 0,9 | 1,0 | 0,4  | 2,9 | 0,1 | 0,4 | 0,0 | 3,6 | 0,2 | 2,9  | 32,6 | 0,2 |
|                              | SD   | 5,9  | 1,0 | 0,3 | 0,7 | 0,1  | 0,9 | 0,1 | 0,1 | 0,1 | 0,7 | 0,1 | 4,9  | 10,6 | 0,1 |
|                              | N    | 16   | 16  | 16  | 16  | 16   | 16  | 16  | 16  | 16  | 16  | 16  | 16   | 16   | 16  |
| CV, cardiopyloric valve      | Mean | 13,4 | 4,7 | 0,5 | 2,7 | 0,4  | 2,1 | 0,1 | 0,6 | 0,0 | 2,7 | 0,4 | 0,0  | 23,9 | 0,4 |
|                              | SD   | 2,7  | 1,3 | 0,1 | 0,6 | 0,2  | 0,2 | 0,1 | 0,1 | 0,0 | 0,8 | 0,1 | 0,0  | 2,3  | 0,3 |
|                              | N    | 12   | 12  | 12  | 12  | 12   | 12  | 12  | 12  | 12  | 12  | 12  | 12   | 12   | 12  |
| LT, lateral tooth            | Mean | 19,2 | 7,1 | 1,5 | 1,9 | 0,4  | 3,4 | 0,1 | 0,4 | 0,0 | 3,4 | 0,1 | 3,4  | 40,0 | 0,2 |
|                              | SD   | 5,6  | 1,4 | 0,5 | 0,4 | 0,1  | 1,0 | 0,1 | 0,1 | 0,0 | 1,5 | 0,1 | 4,7  | 13,7 | 0,1 |
|                              | N    | 44   | 44  | 44  | 44  | 44   | 44  | 44  | 44  | 44  | 44  | 44  | 44   | 44   | 44  |
| MT, medial tooth             | Mean | 20,5 | 6,9 | 1,3 | 2,5 | 0,6  | 4,0 | 0,1 | 0,4 | 0,0 | 2,5 | 0,2 | 4,5  | 45,5 | 0,5 |
|                              | SD   | 9,8  | 1,6 | 0,4 | 0,8 | 0,2  | 1,2 | 0,1 | 0,2 | 0,0 | 1,2 | 0,1 | 7,5  | 12,6 | 0,3 |
|                              | N    | 44   | 44  | 44  | 44  | 44   | 44  | 44  | 44  | 44  | 44  | 44  | 44   | 44   | 44  |
| M, membrane                  | Mean | 1,6  | 0,1 | 0,1 | 0,1 | 0,0  | -   | 0,1 | 0,1 | 0,0 | 0,1 | 0,2 | 0,0  | -    | 0,0 |
|                              | SD   | 0,3  | 0,1 | 0,1 | 0,1 | 0,0  | -   | 0,1 | 0,1 | 0,0 | 0,0 | 0,2 | 0,0  | -    | 0,0 |
|                              | N    | 24   | 24  | 24  | 24  | 24   | -   | 24  | 24  | 24  | 24  | 24  | 24   | -    | 24  |
| PtO, pterocardiac ossicle    | Mean | 12,3 | 5,2 | 0,9 | 0,9 | 0,3  | 2,2 | 0,1 | 0,5 | 0,0 | 2,8 | 0,3 | 0,0  | 24,8 | 0,3 |
|                              | SD   | 3,1  | 1,9 | 0,3 | 0,4 | 0,2  | 0,2 | 0,1 | 0,3 | 0,0 | 0,9 | 0,1 | 0,0  | 2,9  | 0,1 |
|                              | N    | 16   | 16  | 16  | 16  | 16   | 16  | 16  | 16  | 16  | 16  | 16  | 16   | 16   | 16  |
| S, setae                     | Mean | 1,5  | 0,3 | 0,0 | 0,1 | 0,00 | -   | 0,0 | 0,0 | 0,0 | 0,1 | 0,0 | 0,00 | -    | 0,0 |
|                              | SD   | 0,4  | 0,2 | 0,0 | 0,1 | 0,00 | -   | 0,0 | 0,0 | 0,0 | 0,1 | 0,0 | 0,00 | -    | 0,0 |
|                              | N    | 28   | 28  | 28  | 28  | 28   | 28  | 28  | 28  | 28  | 28  | 28  | 28   | -    | 28  |
| LcO, lateral cardiac ossicle | Mean | 11,2 | 3,6 | 0,9 | 2,3 | 0,2  | 2,8 | 0,1 | 0,6 | 0,0 | 2,1 | 0,3 | 0,0  | 32,0 | 0,3 |
|                              | SD   | 2,3  | 1,1 | 0,4 | 0,7 | 0,2  | 0,4 | 0,1 | 0,2 | 0,0 | 0,7 | 0,1 | 0,0  | 4,4  | 0,1 |
|                              | N    | 16   | 16  | 16  | 16  | 16   | 16  | 16  | 16  | 16  | 16  | 16  | 16   | 16   | 16  |
| ZO, zygodiac ossicle         | Mean | 11,5 | 4,8 | 1,0 | 0,9 | 0,5  | 2,0 | 0,1 | 0,4 | 0,0 | 2,5 | 0,2 | 0,0  | 22,9 | 0,3 |
|                              | SD   | 2,2  | 1,3 | 0,5 | 0,3 | 0,1  | 0,2 | 0,1 | 0,2 | 0,0 | 0,8 | 0,1 | 0,0  | 1,7  | 0,1 |
|                              | N    | 12   | 12  | 12  | 12  | 12   | 12  | 12  | 12  | 12  | 12  | 12  | 12   | 12   | 12  |

**Supplementary Table 2.** Chi-Square test followed by pairwise comparison, performed by Wilcoxon method, between the structures for each individual parameter (elements and mechanical properties). Orange p-values = highly significant, red = significant, black = not significant.

| Element                 | Structure 1                  | Structure 2                  | 1-Way Test, Chi-Square approximation |    |          | Wilcoxon Method, p-values |
|-------------------------|------------------------------|------------------------------|--------------------------------------|----|----------|---------------------------|
|                         |                              |                              | Chi-Square                           | DF | p-values |                           |
| Ae                      | LcO, lateral cardiac ossicle | S, setae                     | 160.2208                             | 8  | <.0001*  | <.0001*                   |
|                         | PtO, pterocardiac ossicle    | M, membrane                  |                                      |    |          | <.0001*                   |
|                         | LcO, lateral cardiac ossicle | M, membrane                  |                                      |    |          | <.0001*                   |
|                         | ZO, zygocardiac ossicle      | S, setae                     |                                      |    |          | <.0001*                   |
|                         | ZO, zygocardiac ossicle      | M, membrane                  |                                      |    |          | <.0001*                   |
|                         | MT, medial tooth             | CV, cardiopyloric valve      |                                      |    |          | 0.0022*                   |
|                         | MT, medial tooth             | AT, accessory tooth          |                                      |    |          | 0.0124*                   |
|                         | LT, lateral tooth            | CV, cardiopyloric valve      |                                      |    |          | 0.0180*                   |
|                         | LT, lateral tooth            | AT, accessory tooth          |                                      |    |          | 0.1085                    |
|                         | MT, medial tooth             | LT, lateral tooth            |                                      |    |          | 0.1647                    |
|                         | CV, cardiopyloric valve      | AT, accessory tooth          |                                      |    |          | 0.7628                    |
|                         | LcO, lateral cardiac ossicle | PtO, pterocardiac ossicle    |                                      |    |          | 0.7487                    |
|                         | ZO, zygocardiac ossicle      | PtO, pterocardiac ossicle    |                                      |    |          | 0.5934                    |
|                         | ZO, zygocardiac ossicle      | LcO, lateral cardiac ossicle |                                      |    |          | 0.4861                    |
|                         | S, setae                     | M, membrane                  |                                      |    |          | 0.1575                    |
|                         | PtO, pterocardiac ossicle    | CV, cardiopyloric valve      |                                      |    |          | 0.0244*                   |
|                         | PtO, pterocardiac ossicle    | AT, accessory tooth          |                                      |    |          | 0.0104*                   |
|                         | LcO, lateral cardiac ossicle | CV, cardiopyloric valve      |                                      |    |          | 0.0024*                   |
|                         | ZO, zygocardiac ossicle      | CV, cardiopyloric valve      |                                      |    |          | 0.0009*                   |
|                         | LcO, lateral cardiac ossicle | AT, accessory tooth          |                                      |    |          | 0.0010*                   |
|                         | ZO, zygocardiac ossicle      | AT, accessory tooth          |                                      |    |          | 0.0003*                   |
|                         | M, membrane                  | CV, cardiopyloric valve      |                                      |    |          | <.0001*                   |
|                         | S, setae                     | CV, cardiopyloric valve      |                                      |    |          | <.0001*                   |
|                         | M, membrane                  | AT, accessory tooth          |                                      |    |          | <.0001*                   |
|                         | S, setae                     | AT, accessory tooth          |                                      |    |          | <.0001*                   |
|                         | S, setae                     | PtO, pterocardiac ossicle    |                                      |    |          | <.0001*                   |
|                         | PtO, pterocardiac ossicle    | LT, lateral tooth            |                                      |    |          | <.0001*                   |
|                         | ZO, zygocardiac ossicle      | LT, lateral tooth            |                                      |    |          | <.0001*                   |
|                         | LcO, lateral cardiac ossicle | LT, lateral tooth            |                                      |    |          | <.0001*                   |
|                         | ZO, zygocardiac ossicle      | MT, medial tooth             |                                      |    |          | <.0001*                   |
|                         | PtO, pterocardiac ossicle    | MT, medial tooth             |                                      |    |          | <.0001*                   |
|                         | LcO, lateral cardiac ossicle | MT, medial tooth             |                                      |    |          | <.0001*                   |
| M, membrane             | LT, lateral tooth            | <.0001*                      |                                      |    |          |                           |
| M, membrane             | MT, medial tooth             | <.0001*                      |                                      |    |          |                           |
| S, setae                | LT, lateral tooth            | <.0001*                      |                                      |    |          |                           |
| S, setae                | MT, medial tooth             | <.0001*                      |                                      |    |          |                           |
| Ca                      | LT, lateral tooth            | CV, cardiopyloric valve      | 156.9970                             | 8  | <.0001*  | <.0001*                   |
|                         | LcO, lateral cardiac ossicle | S, setae                     |                                      |    |          | <.0001*                   |
|                         | MT, medial tooth             | CV, cardiopyloric valve      |                                      |    |          | <.0001*                   |
|                         | PtO, pterocardiac ossicle    | M, membrane                  |                                      |    |          | <.0001*                   |
|                         | LcO, lateral cardiac ossicle | M, membrane                  |                                      |    |          | <.0001*                   |
|                         | ZO, zygocardiac ossicle      | S, setae                     |                                      |    |          | <.0001*                   |
|                         | S, setae                     | M, membrane                  |                                      |    |          | <.0001*                   |
|                         | ZO, zygocardiac ossicle      | M, membrane                  |                                      |    |          | <.0001*                   |
|                         | ZO, zygocardiac ossicle      | LcO, lateral cardiac ossicle |                                      |    |          | 0.0178*                   |
|                         | LT, lateral tooth            | AT, accessory tooth          |                                      |    |          | 0.5416                    |
|                         | PtO, pterocardiac ossicle    | CV, cardiopyloric valve      |                                      |    |          | 0.7628                    |
|                         | ZO, zygocardiac ossicle      | CV, cardiopyloric valve      |                                      |    |          | 0.8623                    |
|                         | ZO, zygocardiac ossicle      | PtO, pterocardiac ossicle    |                                      |    |          | 0.6591                    |
|                         | MT, medial tooth             | AT, accessory tooth          |                                      |    |          | 0.4773                    |
|                         | MT, medial tooth             | LT, lateral tooth            |                                      |    |          | 0.2442                    |
|                         | LcO, lateral cardiac ossicle | CV, cardiopyloric valve      |                                      |    |          | 0.0327*                   |
|                         | PtO, pterocardiac ossicle    | AT, accessory tooth          |                                      |    |          | 0.0194*                   |
|                         | LcO, lateral cardiac ossicle | PtO, pterocardiac ossicle    |                                      |    |          | 0.0066*                   |
|                         | ZO, zygocardiac ossicle      | AT, accessory tooth          |                                      |    |          | 0.0005*                   |
|                         | CV, cardiopyloric valve      | AT, accessory tooth          |                                      |    |          | 0.0003*                   |
|                         | PtO, pterocardiac ossicle    | MT, medial tooth             |                                      |    |          | 0.0063*                   |
|                         | LcO, lateral cardiac ossicle | AT, accessory tooth          |                                      |    |          | <.0001*                   |
|                         | PtO, pterocardiac ossicle    | LT, lateral tooth            |                                      |    |          | 0.0016*                   |
|                         | M, membrane                  | CV, cardiopyloric valve      |                                      |    |          | <.0001*                   |
|                         | S, setae                     | CV, cardiopyloric valve      |                                      |    |          | <.0001*                   |
|                         | M, membrane                  | AT, accessory tooth          |                                      |    |          | <.0001*                   |
| ZO, zygocardiac ossicle | MT, medial tooth             | 0.0001*                      |                                      |    |          |                           |
| ZO, zygocardiac ossicle | LT, lateral tooth            | <.0001*                      |                                      |    |          |                           |



|          |                              |                              |          |   |         |         |
|----------|------------------------------|------------------------------|----------|---|---------|---------|
|          | S, setae                     | AT, accessory tooth          |          |   |         | <.0001* |
|          | S, setae                     | PtO, pterocardiac ossicle    |          |   |         | <.0001* |
|          | LcO, lateral cardiac ossicle | LT, lateral tooth            |          |   |         | <.0001* |
|          | LcO, lateral cardiac ossicle | MT, medial tooth             |          |   |         | <.0001* |
|          | M, membrane                  | LT, lateral tooth            |          |   |         | <.0001* |
|          | M, membrane                  | MT, medial tooth             |          |   |         | <.0001* |
|          | S, setae                     | LT, lateral tooth            |          |   |         | <.0001* |
|          | S, setae                     | MT, medial tooth             |          |   |         | <.0001* |
| <b>C</b> | MT, medial tooth             | CV, cardiopyloric valve      | 153.2867 | 8 | <.0001* | <.0001* |
|          | LT, lateral tooth            | CV, cardiopyloric valve      |          |   |         | <.0001* |
|          | LcO, lateral cardiac ossicle | S, setae                     |          |   |         | <.0001* |
|          | PtO, pterocardiac ossicle    | M, membrane                  |          |   |         | <.0001* |
|          | ZO, zygocardiac ossicle      | S, setae                     |          |   |         | <.0001* |
|          | LcO, lateral cardiac ossicle | M, membrane                  |          |   |         | <.0001* |
|          | LT, lateral tooth            | AT, accessory tooth          |          |   |         | 0.0001* |
|          | MT, medial tooth             | AT, accessory tooth          |          |   |         | 0.0002* |
|          | ZO, zygocardiac ossicle      | M, membrane                  |          |   |         | <.0001* |
|          | PtO, pterocardiac ossicle    | CV, cardiopyloric valve      |          |   |         | 0.0005* |
|          | LcO, lateral cardiac ossicle | CV, cardiopyloric valve      |          |   |         | 0.0050* |
|          | ZO, zygocardiac ossicle      | CV, cardiopyloric valve      |          |   |         | 0.0350* |
|          | ZO, zygocardiac ossicle      | LcO, lateral cardiac ossicle |          |   |         | 0.7806  |
|          | ZO, zygocardiac ossicle      | PtO, pterocardiac ossicle    |          |   |         | 0.9260  |
|          | ZO, zygocardiac ossicle      | AT, accessory tooth          |          |   |         | 0.9445  |
|          | PtO, pterocardiac ossicle    | AT, accessory tooth          |          |   |         | 0.8357  |
|          | LcO, lateral cardiac ossicle | PtO, pterocardiac ossicle    |          |   |         | 0.7486  |
|          | LcO, lateral cardiac ossicle | AT, accessory tooth          |          |   |         | 0.5214  |
|          | MT, medial tooth             | LT, lateral tooth            |          |   |         | 0.1790  |
|          | CV, cardiopyloric valve      | AT, accessory tooth          |          |   |         | 0.0002* |
|          | ZO, zygocardiac ossicle      | MT, medial tooth             |          |   |         | 0.0166* |
|          | ZO, zygocardiac ossicle      | LT, lateral tooth            |          |   |         | 0.0094* |
|          | PtO, pterocardiac ossicle    | MT, medial tooth             |          |   |         | 0.0006* |
|          | M, membrane                  | CV, cardiopyloric valve      |          |   |         | <.0001* |
|          | LcO, lateral cardiac ossicle | MT, medial tooth             |          |   |         | 0.0002* |
|          | LcO, lateral cardiac ossicle | LT, lateral tooth            |          |   |         | 0.0001* |
|          | S, setae                     | CV, cardiopyloric valve      |          |   |         | <.0001* |
|          | M, membrane                  | AT, accessory tooth          |          |   |         | <.0001* |
|          | PtO, pterocardiac ossicle    | LT, lateral tooth            |          |   |         | <.0001* |
|          | S, setae                     | M, membrane                  |          |   |         | <.0001* |
|          | S, setae                     | AT, accessory tooth          |          |   |         | <.0001* |
|          | S, setae                     | PtO, pterocardiac ossicle    |          |   |         | <.0001* |
|          | M, membrane                  | LT, lateral tooth            |          |   |         | <.0001* |
|          | M, membrane                  | MT, medial tooth             |          |   |         | <.0001* |
|          | S, setae                     | LT, lateral tooth            |          |   |         | <.0001* |
|          | S, setae                     | MT, medial tooth             |          |   |         | <.0001* |
| <b>F</b> | MT, medial tooth             | AT, accessory tooth          | 167.9770 | 8 | <.0001* | <.0001* |
|          | LT, lateral tooth            | AT, accessory tooth          |          |   |         | <.0001* |
|          | LcO, lateral cardiac ossicle | S, setae                     |          |   |         | <.0001* |
|          | LcO, lateral cardiac ossicle | M, membrane                  |          |   |         | <.0001* |
|          | ZO, zygocardiac ossicle      | S, setae                     |          |   |         | <.0001* |
|          | PtO, pterocardiac ossicle    | M, membrane                  |          |   |         | <.0001* |
|          | ZO, zygocardiac ossicle      | M, membrane                  |          |   |         | <.0001* |
|          | MT, medial tooth             | LT, lateral tooth            |          |   |         | 0.0011* |
|          | LcO, lateral cardiac ossicle | PtO, pterocardiac ossicle    |          |   |         | <.0001* |
|          | LcO, lateral cardiac ossicle | AT, accessory tooth          |          |   |         | <.0001* |
|          | CV, cardiopyloric valve      | AT, accessory tooth          |          |   |         | <.0001* |
|          | LcO, lateral cardiac ossicle | LT, lateral tooth            |          |   |         | 0.0447* |
|          | S, setae                     | M, membrane                  |          |   |         | 0.6610  |
|          | ZO, zygocardiac ossicle      | PtO, pterocardiac ossicle    |          |   |         | 0.8709  |
|          | ZO, zygocardiac ossicle      | AT, accessory tooth          |          |   |         | 0.7983  |
|          | PtO, pterocardiac ossicle    | AT, accessory tooth          |          |   |         | 0.6784  |
|          | LcO, lateral cardiac ossicle | MT, medial tooth             |          |   |         | 0.6337  |
|          | LcO, lateral cardiac ossicle | CV, cardiopyloric valve      |          |   |         | 0.1499  |
|          | MT, medial tooth             | CV, cardiopyloric valve      |          |   |         | 0.2990  |
|          | ZO, zygocardiac ossicle      | CV, cardiopyloric valve      |          |   |         | <.0001* |
|          | ZO, zygocardiac ossicle      | LcO, lateral cardiac ossicle |          |   |         | <.0001* |
|          | PtO, pterocardiac ossicle    | CV, cardiopyloric valve      |          |   |         | <.0001* |
|          | M, membrane                  | CV, cardiopyloric valve      |          |   |         | <.0001* |
|          | LT, lateral tooth            | CV, cardiopyloric valve      |          |   |         | 0.0005* |
|          | M, membrane                  | AT, accessory tooth          |          |   |         | <.0001* |
|          | S, setae                     | CV, cardiopyloric valve      |          |   |         | <.0001* |
|          | S, setae                     | AT, accessory tooth          |          |   |         | <.0001* |

|           |                              |                              |          |   |         |         |
|-----------|------------------------------|------------------------------|----------|---|---------|---------|
|           | S, setae                     | PtO, pterocardiac ossicle    |          |   |         | <.0001* |
|           | ZO, zygocardiac ossicle      | LT, lateral tooth            |          |   |         | <.0001* |
|           | ZO, zygocardiac ossicle      | MT, medial tooth             |          |   |         | <.0001* |
|           | PtO, pterocardiac ossicle    | LT, lateral tooth            |          |   |         | <.0001* |
|           | PtO, pterocardiac ossicle    | MT, medial tooth             |          |   |         | <.0001* |
|           | M, membrane                  | LT, lateral tooth            |          |   |         | <.0001* |
|           | M, membrane                  | MT, medial tooth             |          |   |         | <.0001* |
|           | S, setae                     | LT, lateral tooth            |          |   |         | <.0001* |
|           | S, setae                     | MT, medial tooth             |          |   |         | <.0001* |
| <b>Fe</b> | MT, medial tooth             | LT, lateral tooth            | 110.3975 | 7 | <.0001* | <.0001* |
|           | PtO, pterocardiac ossicle    | M, membrane                  |          |   |         | <.0001* |
|           | MT, medial tooth             | AT, accessory tooth          |          |   |         | 0.0001* |
|           | ZO, zygocardiac ossicle      | M, membrane                  |          |   |         | <.0001* |
|           | LcO, lateral cardiac ossicle | M, membrane                  |          |   |         | <.0001* |
|           | MT, medial tooth             | CV, cardiopyloric valve      |          |   |         | 0.0026* |
|           | ZO, zygocardiac ossicle      | LT, lateral tooth            |          |   |         | 0.0117* |
|           | ZO, zygocardiac ossicle      | LcO, lateral cardiac ossicle |          |   |         | 0.0018* |
|           | ZO, zygocardiac ossicle      | PtO, pterocardiac ossicle    |          |   |         | 0.0036* |
|           | ZO, zygocardiac ossicle      | AT, accessory tooth          |          |   |         | 0.1698  |
|           | ZO, zygocardiac ossicle      | CV, cardiopyloric valve      |          |   |         | 0.3547  |
|           | CV, cardiopyloric valve      | AT, accessory tooth          |          |   |         | 0.8891  |
|           | LT, lateral tooth            | CV, cardiopyloric valve      |          |   |         | 0.3842  |
|           | LT, lateral tooth            | AT, accessory tooth          |          |   |         | 0.3486  |
|           | LcO, lateral cardiac ossicle | PtO, pterocardiac ossicle    |          |   |         | 0.1008  |
|           | PtO, pterocardiac ossicle    | CV, cardiopyloric valve      |          |   |         | 0.0242* |
|           | PtO, pterocardiac ossicle    | AT, accessory tooth          |          |   |         | 0.0316* |
|           | LcO, lateral cardiac ossicle | CV, cardiopyloric valve      |          |   |         | 0.0057* |
|           | LcO, lateral cardiac ossicle | AT, accessory tooth          |          |   |         | 0.0050* |
|           | PtO, pterocardiac ossicle    | LT, lateral tooth            |          |   |         | 0.0341* |
|           | ZO, zygocardiac ossicle      | MT, medial tooth             |          |   |         | 0.0115* |
|           | LcO, lateral cardiac ossicle | LT, lateral tooth            |          |   |         | 0.0022* |
|           | M, membrane                  | CV, cardiopyloric valve      |          |   |         | <.0001* |
|           | M, membrane                  | AT, accessory tooth          |          |   |         | <.0001* |
|           | PtO, pterocardiac ossicle    | MT, medial tooth             |          |   |         | <.0001* |
|           | LcO, lateral cardiac ossicle | MT, medial tooth             |          |   |         | <.0001* |
|           | M, membrane                  | LT, lateral tooth            |          |   |         | <.0001* |
|           | M, membrane                  | MT, medial tooth             |          |   |         | <.0001* |
| <b>H</b>  | MT, medial tooth             | CV, cardiopyloric valve      | 89.8181  | 6 | <.0001* | <.0001* |
|           | LT, lateral tooth            | CV, cardiopyloric valve      |          |   |         | <.0001* |
|           | MT, medial tooth             | AT, accessory tooth          |          |   |         | 0.0002* |
|           | MT, medial tooth             | LT, lateral tooth            |          |   |         | 0.0015* |
|           | LcO, lateral cardiac ossicle | PtO, pterocardiac ossicle    |          |   |         | <.0001* |
|           | LcO, lateral cardiac ossicle | CV, cardiopyloric valve      |          |   |         | <.0001* |
|           | LT, lateral tooth            | AT, accessory tooth          |          |   |         | 0.0697  |
|           | LcO, lateral cardiac ossicle | AT, accessory tooth          |          |   |         | 0.4397  |
|           | PtO, pterocardiac ossicle    | CV, cardiopyloric valve      |          |   |         | 0.4437  |
|           | ZO, zygocardiac ossicle      | CV, cardiopyloric valve      |          |   |         | 0.2855  |
|           | LcO, lateral cardiac ossicle | LT, lateral tooth            |          |   |         | 0.3119  |
|           | ZO, zygocardiac ossicle      | PtO, pterocardiac ossicle    |          |   |         | 0.0274* |
|           | PtO, pterocardiac ossicle    | AT, accessory tooth          |          |   |         | 0.0104* |
|           | CV, cardiopyloric valve      | AT, accessory tooth          |          |   |         | 0.0057* |
|           | ZO, zygocardiac ossicle      | AT, accessory tooth          |          |   |         | 0.0004* |
|           | ZO, zygocardiac ossicle      | LcO, lateral cardiac ossicle |          |   |         | <.0001* |
|           | LcO, lateral cardiac ossicle | MT, medial tooth             |          |   |         | <.0001* |
|           | PtO, pterocardiac ossicle    | LT, lateral tooth            |          |   |         | <.0001* |
|           | ZO, zygocardiac ossicle      | LT, lateral tooth            |          |   |         | <.0001* |
|           | ZO, zygocardiac ossicle      | MT, medial tooth             |          |   |         | <.0001* |
|           | PtO, pterocardiac ossicle    | MT, medial tooth             |          |   |         | <.0001* |
| <b>K</b>  | ZO, zygocardiac ossicle      | S, setae                     | 72.5666  | 8 | <.0001* | <.0001* |
|           | LcO, lateral cardiac ossicle | S, setae                     |          |   |         | <.0001* |
|           | PtO, pterocardiac ossicle    | M, membrane                  |          |   |         | 0.0056* |
|           | ZO, zygocardiac ossicle      | M, membrane                  |          |   |         | 0.0488* |
|           | LcO, lateral cardiac ossicle | M, membrane                  |          |   |         | 0.0878  |
|           | PtO, pterocardiac ossicle    | LT, lateral tooth            |          |   |         | 0.7057  |
|           | PtO, pterocardiac ossicle    | MT, medial tooth             |          |   |         | 0.8276  |
|           | MT, medial tooth             | LT, lateral tooth            |          |   |         | 0.9667  |
|           | ZO, zygocardiac ossicle      | LcO, lateral cardiac ossicle |          |   |         | 0.9629  |
|           | PtO, pterocardiac ossicle    | CV, cardiopyloric valve      |          |   |         | 0.7433  |
|           | CV, cardiopyloric valve      | AT, accessory tooth          |          |   |         | 0.7265  |
|           | LcO, lateral cardiac ossicle | CV, cardiopyloric valve      |          |   |         | 0.7269  |
|           | MT, medial tooth             | CV, cardiopyloric valve      |          |   |         | 0.7414  |

|           |                              |                              |          |   |         |         |
|-----------|------------------------------|------------------------------|----------|---|---------|---------|
|           | PtO, pterocardiac ossicle    | AT, accessory tooth          |          |   |         | 0.5703  |
|           | ZO, zygocardiac ossicle      | PtO, pterocardiac ossicle    |          |   |         | 0.4994  |
|           | LcO, lateral cardiac ossicle | PtO, pterocardiac ossicle    |          |   |         | 0.5083  |
|           | ZO, zygocardiac ossicle      | MT, medial tooth             |          |   |         | 0.6671  |
|           | ZO, zygocardiac ossicle      | CV, cardiopyloric valve      |          |   |         | 0.4177  |
|           | LcO, lateral cardiac ossicle | LT, lateral tooth            |          |   |         | 0.6388  |
|           | ZO, zygocardiac ossicle      | LT, lateral tooth            |          |   |         | 0.6523  |
|           | LcO, lateral cardiac ossicle | MT, medial tooth             |          |   |         | 0.5977  |
|           | LcO, lateral cardiac ossicle | AT, accessory tooth          |          |   |         | 0.3451  |
|           | LT, lateral tooth            | CV, cardiopyloric valve      |          |   |         | 0.5212  |
|           | ZO, zygocardiac ossicle      | AT, accessory tooth          |          |   |         | 0.2743  |
|           | MT, medial tooth             | AT, accessory tooth          |          |   |         | 0.4714  |
|           | LT, lateral tooth            | AT, accessory tooth          |          |   |         | 0.3655  |
|           | M, membrane                  | CV, cardiopyloric valve      |          |   |         | 0.0063* |
|           | M, membrane                  | AT, accessory tooth          |          |   |         | 0.0028* |
|           | M, membrane                  | MT, medial tooth             |          |   |         | 0.0020* |
|           | M, membrane                  | LT, lateral tooth            |          |   |         | 0.0014* |
|           | S, setae                     | M, membrane                  |          |   |         | <.0001* |
|           | S, setae                     | CV, cardiopyloric valve      |          |   |         | <.0001* |
|           | S, setae                     | AT, accessory tooth          |          |   |         | <.0001* |
|           | S, setae                     | PtO, pterocardiac ossicle    |          |   |         | <.0001* |
|           | S, setae                     | MT, medial tooth             |          |   |         | <.0001* |
|           | S, setae                     | LT, lateral tooth            |          |   |         | <.0001* |
| <b>Mg</b> | LcO, lateral cardiac ossicle | S, setae                     | 125.6214 | 8 | <.0001* | <.0001* |
|           | LcO, lateral cardiac ossicle | M, membrane                  |          |   |         | <.0001* |
|           | ZO, zygocardiac ossicle      | S, setae                     |          |   |         | <.0001* |
|           | LcO, lateral cardiac ossicle | LT, lateral tooth            |          |   |         | 0.0001* |
|           | PtO, pterocardiac ossicle    | M, membrane                  |          |   |         | <.0001* |
|           | ZO, zygocardiac ossicle      | M, membrane                  |          |   |         | <.0001* |
|           | LcO, lateral cardiac ossicle | MT, medial tooth             |          |   |         | 0.0124* |
|           | PtO, pterocardiac ossicle    | LT, lateral tooth            |          |   |         | 0.0191* |
|           | CV, cardiopyloric valve      | AT, accessory tooth          |          |   |         | 0.0015* |
|           | PtO, pterocardiac ossicle    | MT, medial tooth             |          |   |         | 0.0928  |
|           | LcO, lateral cardiac ossicle | AT, accessory tooth          |          |   |         | 0.0234* |
|           | PtO, pterocardiac ossicle    | AT, accessory tooth          |          |   |         | 0.1996  |
|           | MT, medial tooth             | LT, lateral tooth            |          |   |         | 0.5930  |
|           | LcO, lateral cardiac ossicle | PtO, pterocardiac ossicle    |          |   |         | 0.8800  |
|           | ZO, zygocardiac ossicle      | LT, lateral tooth            |          |   |         | 0.9522  |
|           | PtO, pterocardiac ossicle    | CV, cardiopyloric valve      |          |   |         | 0.5299  |
|           | ZO, zygocardiac ossicle      | MT, medial tooth             |          |   |         | 0.6895  |
|           | MT, medial tooth             | AT, accessory tooth          |          |   |         | 0.6218  |
|           | LcO, lateral cardiac ossicle | CV, cardiopyloric valve      |          |   |         | 0.2956  |
|           | ZO, zygocardiac ossicle      | AT, accessory tooth          |          |   |         | 0.2955  |
|           | ZO, zygocardiac ossicle      | PtO, pterocardiac ossicle    |          |   |         | 0.1039  |
|           | ZO, zygocardiac ossicle      | LcO, lateral cardiac ossicle |          |   |         | 0.0081* |
|           | LT, lateral tooth            | AT, accessory tooth          |          |   |         | 0.1008  |
|           | ZO, zygocardiac ossicle      | CV, cardiopyloric valve      |          |   |         | 0.0010* |
|           | MT, medial tooth             | CV, cardiopyloric valve      |          |   |         | 0.0040* |
|           | S, setae                     | M, membrane                  |          |   |         | 0.0001* |
|           | M, membrane                  | CV, cardiopyloric valve      |          |   |         | <.0001* |
|           | M, membrane                  | AT, accessory tooth          |          |   |         | <.0001* |
|           | S, setae                     | CV, cardiopyloric valve      |          |   |         | <.0001* |
|           | S, setae                     | PtO, pterocardiac ossicle    |          |   |         | <.0001* |
|           | S, setae                     | AT, accessory tooth          |          |   |         | <.0001* |
|           | LT, lateral tooth            | CV, cardiopyloric valve      |          |   |         | <.0001* |
|           | M, membrane                  | MT, medial tooth             |          |   |         | <.0001* |
|           | M, membrane                  | LT, lateral tooth            |          |   |         | <.0001* |
|           | S, setae                     | MT, medial tooth             |          |   |         | <.0001* |
|           | S, setae                     | LT, lateral tooth            |          |   |         | <.0001* |
| <b>Na</b> | PtO, pterocardiac ossicle    | LT, lateral tooth            | 34.7796  | 8 | <.0001* | 0.0008* |
|           | PtO, pterocardiac ossicle    | MT, medial tooth             |          |   |         | 0.0031* |
|           | ZO, zygocardiac ossicle      | LT, lateral tooth            |          |   |         | 0.0068* |
|           | ZO, zygocardiac ossicle      | MT, medial tooth             |          |   |         | 0.0250* |
|           | PtO, pterocardiac ossicle    | M, membrane                  |          |   |         | 0.0892  |
|           | ZO, zygocardiac ossicle      | S, setae                     |          |   |         | 0.0385* |
|           | M, membrane                  | LT, lateral tooth            |          |   |         | 0.0921  |
|           | ZO, zygocardiac ossicle      | LcO, lateral cardiac ossicle |          |   |         | 0.1581  |
|           | M, membrane                  | MT, medial tooth             |          |   |         | 0.2388  |
|           | PtO, pterocardiac ossicle    | CV, cardiopyloric valve      |          |   |         | 0.2718  |
|           | ZO, zygocardiac ossicle      | M, membrane                  |          |   |         | 0.2886  |
|           | ZO, zygocardiac ossicle      | CV, cardiopyloric valve      |          |   |         | 0.5691  |

|          |                              |                              |          |   |         |         |
|----------|------------------------------|------------------------------|----------|---|---------|---------|
|          | LcO, lateral cardiac ossicle | LT, lateral tooth            |          |   |         | 0.4680  |
|          | MT, medial tooth             | LT, lateral tooth            |          |   |         | 0.5681  |
|          | LcO, lateral cardiac ossicle | S, setae                     |          |   |         | 0.7100  |
|          | LcO, lateral cardiac ossicle | MT, medial tooth             |          |   |         | 0.8076  |
|          | S, setae                     | LT, lateral tooth            |          |   |         | 0.7609  |
|          | S, setae                     | MT, medial tooth             |          |   |         | 0.8544  |
|          | M, membrane                  | CV, cardiopyloric valve      |          |   |         | 0.6956  |
|          | LcO, lateral cardiac ossicle | M, membrane                  |          |   |         | 0.5413  |
|          | ZO, zygocardiac ossicle      | PtO, pterocardiac ossicle    |          |   |         | 0.6003  |
|          | PtO, pterocardiac ossicle    | AT, accessory tooth          |          |   |         | 0.6181  |
|          | LcO, lateral cardiac ossicle | CV, cardiopyloric valve      |          |   |         | 0.3872  |
|          | S, setae                     | M, membrane                  |          |   |         | 0.2408  |
|          | S, setae                     | CV, cardiopyloric valve      |          |   |         | 0.1551  |
|          | ZO, zygocardiac ossicle      | AT, accessory tooth          |          |   |         | 0.3029  |
|          | MT, medial tooth             | CV, cardiopyloric valve      |          |   |         | 0.1460  |
|          | LT, lateral tooth            | CV, cardiopyloric valve      |          |   |         | 0.0518  |
|          | CV, cardiopyloric valve      | AT, accessory tooth          |          |   |         | 0.1042  |
|          | LcO, lateral cardiac ossicle | PtO, pterocardiac ossicle    |          |   |         | 0.0599  |
|          | LcO, lateral cardiac ossicle | AT, accessory tooth          |          |   |         | 0.0132* |
|          | S, setae                     | PtO, pterocardiac ossicle    |          |   |         | 0.0089* |
|          | M, membrane                  | AT, accessory tooth          |          |   |         | 0.0148* |
|          | S, setae                     | AT, accessory tooth          |          |   |         | 0.0008* |
|          | MT, medial tooth             | AT, accessory tooth          |          |   |         | 0.0001* |
|          | LT, lateral tooth            | AT, accessory tooth          |          |   |         | <.0001* |
| <b>P</b> | MT, medial tooth             | LT, lateral tooth            | 163.2894 | 8 | <.0001* | <.0001* |
|          | LcO, lateral cardiac ossicle | LT, lateral tooth            |          |   |         | <.0001* |
|          | PtO, pterocardiac ossicle    | LT, lateral tooth            |          |   |         | <.0001* |
|          | ZO, zygocardiac ossicle      | LT, lateral tooth            |          |   |         | <.0001* |
|          | LcO, lateral cardiac ossicle | S, setae                     |          |   |         | <.0001* |
|          | PtO, pterocardiac ossicle    | M, membrane                  |          |   |         | <.0001* |
|          | LcO, lateral cardiac ossicle | M, membrane                  |          |   |         | <.0001* |
|          | ZO, zygocardiac ossicle      | S, setae                     |          |   |         | <.0001* |
|          | ZO, zygocardiac ossicle      | M, membrane                  |          |   |         | <.0001* |
|          | CV, cardiopyloric valve      | AT, accessory tooth          |          |   |         | <.0001* |
|          | MT, medial tooth             | AT, accessory tooth          |          |   |         | 0.0206* |
|          | LcO, lateral cardiac ossicle | AT, accessory tooth          |          |   |         | 0.0021* |
|          | PtO, pterocardiac ossicle    | AT, accessory tooth          |          |   |         | 0.0079* |
|          | ZO, zygocardiac ossicle      | AT, accessory tooth          |          |   |         | 0.0816  |
|          | LcO, lateral cardiac ossicle | MT, medial tooth             |          |   |         | 0.3534  |
|          | PtO, pterocardiac ossicle    | MT, medial tooth             |          |   |         | 0.4568  |
|          | LcO, lateral cardiac ossicle | PtO, pterocardiac ossicle    |          |   |         | 0.7486  |
|          | S, setae                     | M, membrane                  |          |   |         | 0.4886  |
|          | ZO, zygocardiac ossicle      | PtO, pterocardiac ossicle    |          |   |         | 0.0993  |
|          | ZO, zygocardiac ossicle      | MT, medial tooth             |          |   |         | 0.2633  |
|          | ZO, zygocardiac ossicle      | LcO, lateral cardiac ossicle |          |   |         | 0.0190* |
|          | ZO, zygocardiac ossicle      | CV, cardiopyloric valve      |          |   |         | <.0001* |
|          | LcO, lateral cardiac ossicle | CV, cardiopyloric valve      |          |   |         | 0.0001* |
|          | PtO, pterocardiac ossicle    | CV, cardiopyloric valve      |          |   |         | <.0001* |
|          | M, membrane                  | LT, lateral tooth            |          |   |         | 0.0057* |
|          | M, membrane                  | CV, cardiopyloric valve      |          |   |         | <.0001* |
|          | M, membrane                  | AT, accessory tooth          |          |   |         | <.0001* |
|          | S, setae                     | LT, lateral tooth            |          |   |         | 0.0001* |
|          | S, setae                     | CV, cardiopyloric valve      |          |   |         | <.0001* |
|          | S, setae                     | AT, accessory tooth          |          |   |         | <.0001* |
|          | S, setae                     | PtO, pterocardiac ossicle    |          |   |         | <.0001* |
|          | LT, lateral tooth            | AT, accessory tooth          |          |   |         | <.0001* |
|          | MT, medial tooth             | CV, cardiopyloric valve      |          |   |         | <.0001* |
|          | LT, lateral tooth            | CV, cardiopyloric valve      |          |   |         | <.0001* |
|          | M, membrane                  | MT, medial tooth             |          |   |         | <.0001* |
|          | S, setae                     | MT, medial tooth             |          |   |         | <.0001* |
| <b>S</b> | LcO, lateral cardiac ossicle | LT, lateral tooth            | 107.9259 | 8 | <.0001* | <.0001* |
|          | LcO, lateral cardiac ossicle | S, setae                     |          |   |         | <.0001* |
|          | PtO, pterocardiac ossicle    | LT, lateral tooth            |          |   |         | <.0001* |
|          | ZO, zygocardiac ossicle      | S, setae                     |          |   |         | <.0001* |
|          | LcO, lateral cardiac ossicle | MT, medial tooth             |          |   |         | 0.0002* |
|          | PtO, pterocardiac ossicle    | MT, medial tooth             |          |   |         | 0.0034* |
|          | LcO, lateral cardiac ossicle | M, membrane                  |          |   |         | 0.0003* |
|          | CV, cardiopyloric valve      | AT, accessory tooth          |          |   |         | 0.0002* |
|          | PtO, pterocardiac ossicle    | M, membrane                  |          |   |         | 0.0018* |
|          | LcO, lateral cardiac ossicle | AT, accessory tooth          |          |   |         | 0.0049* |
|          | MT, medial tooth             | LT, lateral tooth            |          |   |         | 0.1628  |

|    |                              |                              |         |   |         |         |
|----|------------------------------|------------------------------|---------|---|---------|---------|
|    | PtO, pterocardiac ossicle    | AT, accessory tooth          |         |   |         | 0.0343* |
|    | ZO, zygocardiac ossicle      | LT, lateral tooth            |         |   |         | 0.4120  |
|    | ZO, zygocardiac ossicle      | M, membrane                  |         |   |         | 0.4006  |
|    | LcO, lateral cardiac ossicle | PtO, pterocardiac ossicle    |         |   |         | 0.5839  |
|    | ZO, zygocardiac ossicle      | MT, medial tooth             |         |   |         | 0.9203  |
|    | M, membrane                  | LT, lateral tooth            |         |   |         | 0.8875  |
|    | ZO, zygocardiac ossicle      | AT, accessory tooth          |         |   |         | 0.2446  |
|    | MT, medial tooth             | AT, accessory tooth          |         |   |         | 0.3399  |
|    | M, membrane                  | MT, medial tooth             |         |   |         | 0.2747  |
|    | LcO, lateral cardiac ossicle | CV, cardiopyloric valve      |         |   |         | 0.0664  |
|    | PtO, pterocardiac ossicle    | CV, cardiopyloric valve      |         |   |         | 0.0365* |
|    | M, membrane                  | AT, accessory tooth          |         |   |         | 0.0791  |
|    | ZO, zygocardiac ossicle      | PtO, pterocardiac ossicle    |         |   |         | 0.0081* |
|    | ZO, zygocardiac ossicle      | LcO, lateral cardiac ossicle |         |   |         | 0.0010* |
|    | ZO, zygocardiac ossicle      | CV, cardiopyloric valve      |         |   |         | 0.0002* |
|    | LT, lateral tooth            | AT, accessory tooth          |         |   |         | 0.0275* |
|    | M, membrane                  | CV, cardiopyloric valve      |         |   |         | <.0001* |
|    | S, setae                     | CV, cardiopyloric valve      |         |   |         | <.0001* |
|    | S, setae                     | M, membrane                  |         |   |         | <.0001* |
|    | S, setae                     | PtO, pterocardiac ossicle    |         |   |         | <.0001* |
|    | S, setae                     | AT, accessory tooth          |         |   |         | <.0001* |
|    | MT, medial tooth             | CV, cardiopyloric valve      |         |   |         | <.0001* |
|    | LT, lateral tooth            | CV, cardiopyloric valve      |         |   |         | <.0001* |
|    | S, setae                     | MT, medial tooth             |         |   |         | <.0001* |
|    | S, setae                     | LT, lateral tooth            |         |   |         | <.0001* |
| Si | MT, medial tooth             | CV, cardiopyloric valve      | 68.7669 | 8 | <.0001* | 0.0044* |
|    | LT, lateral tooth            | CV, cardiopyloric valve      |         |   |         | 0.0048* |
|    | ZO, zygocardiac ossicle      | S, setae                     |         |   |         | <.0001* |
|    | ZO, zygocardiac ossicle      | M, membrane                  |         |   |         | 0.0002* |
|    | PtO, pterocardiac ossicle    | M, membrane                  |         |   |         | 0.0005* |
|    | ZO, zygocardiac ossicle      | LcO, lateral cardiac ossicle |         |   |         | 0.0079* |
|    | PtO, pterocardiac ossicle    | CV, cardiopyloric valve      |         |   |         | 0.0876  |
|    | ZO, zygocardiac ossicle      | CV, cardiopyloric valve      |         |   |         | 0.0790  |
|    | LcO, lateral cardiac ossicle | S, setae                     |         |   |         | 0.2021  |
|    | LcO, lateral cardiac ossicle | M, membrane                  |         |   |         | 0.2405  |
|    | MT, medial tooth             | LT, lateral tooth            |         |   |         | 0.9586  |
|    | ZO, zygocardiac ossicle      | PtO, pterocardiac ossicle    |         |   |         | 0.9396  |
|    | S, setae                     | M, membrane                  |         |   |         | 1.0000  |
|    | LT, lateral tooth            | AT, accessory tooth          |         |   |         | 0.9931  |
|    | MT, medial tooth             | AT, accessory tooth          |         |   |         | 0.9314  |
|    | LcO, lateral cardiac ossicle | CV, cardiopyloric valve      |         |   |         | 0.3872  |
|    | M, membrane                  | CV, cardiopyloric valve      |         |   |         | 0.0470* |
|    | S, setae                     | CV, cardiopyloric valve      |         |   |         | 0.0317* |
|    | LcO, lateral cardiac ossicle | PtO, pterocardiac ossicle    |         |   |         | 0.0115* |
|    | ZO, zygocardiac ossicle      | AT, accessory tooth          |         |   |         | 0.0276* |
|    | PtO, pterocardiac ossicle    | AT, accessory tooth          |         |   |         | 0.0099* |
|    | ZO, zygocardiac ossicle      | LT, lateral tooth            |         |   |         | 0.0841  |
|    | CV, cardiopyloric valve      | AT, accessory tooth          |         |   |         | 0.0023* |
|    | ZO, zygocardiac ossicle      | MT, medial tooth             |         |   |         | 0.0770  |
|    | S, setae                     | PtO, pterocardiac ossicle    |         |   |         | 0.0002* |
|    | PtO, pterocardiac ossicle    | LT, lateral tooth            |         |   |         | 0.0402* |
|    | PtO, pterocardiac ossicle    | MT, medial tooth             |         |   |         | 0.0346* |
|    | LcO, lateral cardiac ossicle | AT, accessory tooth          |         |   |         | 0.0002* |
|    | M, membrane                  | AT, accessory tooth          |         |   |         | <.0001* |
|    | S, setae                     | AT, accessory tooth          |         |   |         | <.0001* |
|    | LcO, lateral cardiac ossicle | LT, lateral tooth            |         |   |         | 0.0003* |
|    | LcO, lateral cardiac ossicle | MT, medial tooth             |         |   |         | 0.0003* |
|    | M, membrane                  | LT, lateral tooth            |         |   |         | <.0001* |
|    | M, membrane                  | MT, medial tooth             |         |   |         | <.0001* |
|    | S, setae                     | LT, lateral tooth            |         |   |         | <.0001* |
|    | S, setae                     | MT, medial tooth             |         |   |         | <.0001* |
| E  | MT, medial tooth             | CV, cardiopyloric valve      | 89.3089 | 6 | <.0001* | <.0001* |
|    | LT, lateral tooth            | CV, cardiopyloric valve      |         |   |         | <.0001* |
|    | MT, medial tooth             | AT, accessory tooth          |         |   |         | 0.0002* |
|    | MT, medial tooth             | LT, lateral tooth            |         |   |         | 0.0020* |
|    | LcO, lateral cardiac ossicle | PtO, pterocardiac ossicle    |         |   |         | <.0001* |
|    | LcO, lateral cardiac ossicle | CV, cardiopyloric valve      |         |   |         | 0.0001* |
|    | LT, lateral tooth            | AT, accessory tooth          |         |   |         | 0.0359* |
|    | PtO, pterocardiac ossicle    | CV, cardiopyloric valve      |         |   |         | 0.3904  |
|    | LcO, lateral cardiac ossicle | AT, accessory tooth          |         |   |         | 0.4624  |
|    | ZO, zygocardiac ossicle      | CV, cardiopyloric valve      |         |   |         | 0.2366  |

|    |                              |                              |          |   |         |         |
|----|------------------------------|------------------------------|----------|---|---------|---------|
|    | LcO, lateral cardiac ossicle | LT, lateral tooth            |          |   |         | 0.3119  |
|    | ZO, zygocardiac ossicle      | PtO, pterocardiac ossicle    |          |   |         | 0.0601  |
|    | PtO, pterocardiac ossicle    | AT, accessory tooth          |          |   |         | 0.0176* |
|    | CV, cardiopyloric valve      | AT, accessory tooth          |          |   |         | 0.0066* |
|    | ZO, zygocardiac ossicle      | AT, accessory tooth          |          |   |         | 0.0005* |
|    | ZO, zygocardiac ossicle      | LcO, lateral cardiac ossicle |          |   |         | <.0001* |
|    | LcO, lateral cardiac ossicle | MT, medial tooth             |          |   |         | 0.0001* |
|    | PtO, pterocardiac ossicle    | LT, lateral tooth            |          |   |         | <.0001* |
|    | ZO, zygocardiac ossicle      | LT, lateral tooth            |          |   |         | <.0001* |
|    | ZO, zygocardiac ossicle      | MT, medial tooth             |          |   |         | <.0001* |
|    | PtO, pterocardiac ossicle    | MT, medial tooth             |          |   |         | <.0001* |
| Zn | MT, medial tooth             | LT, lateral tooth            | 135.6499 | 8 | <.0001* | <.0001* |
|    | LcO, lateral cardiac ossicle | S, setae                     |          |   |         | <.0001* |
|    | PtO, pterocardiac ossicle    | M, membrane                  |          |   |         | <.0001* |
|    | LcO, lateral cardiac ossicle | M, membrane                  |          |   |         | <.0001* |
|    | ZO, zygocardiac ossicle      | S, setae                     |          |   |         | <.0001* |
|    | ZO, zygocardiac ossicle      | M, membrane                  |          |   |         | <.0001* |
|    | LcO, lateral cardiac ossicle | LT, lateral tooth            |          |   |         | 0.0010* |
|    | MT, medial tooth             | AT, accessory tooth          |          |   |         | 0.0022* |
|    | PtO, pterocardiac ossicle    | LT, lateral tooth            |          |   |         | 0.0409* |
|    | LcO, lateral cardiac ossicle | AT, accessory tooth          |          |   |         | 0.0102* |
|    | CV, cardiopyloric valve      | AT, accessory tooth          |          |   |         | 0.0136* |
|    | ZO, zygocardiac ossicle      | LT, lateral tooth            |          |   |         | 0.1800  |
|    | PtO, pterocardiac ossicle    | AT, accessory tooth          |          |   |         | 0.0927  |
|    | LcO, lateral cardiac ossicle | PtO, pterocardiac ossicle    |          |   |         | 0.1799  |
|    | ZO, zygocardiac ossicle      | AT, accessory tooth          |          |   |         | 0.2738  |
|    | MT, medial tooth             | CV, cardiopyloric valve      |          |   |         | 0.5489  |
|    | S, setae                     | M, membrane                  |          |   |         | 0.9260  |
|    | LcO, lateral cardiac ossicle | CV, cardiopyloric valve      |          |   |         | 0.7274  |
|    | ZO, zygocardiac ossicle      | PtO, pterocardiac ossicle    |          |   |         | 0.6748  |
|    | LT, lateral tooth            | AT, accessory tooth          |          |   |         | 0.6631  |
|    | PtO, pterocardiac ossicle    | CV, cardiopyloric valve      |          |   |         | 0.2742  |
|    | ZO, zygocardiac ossicle      | CV, cardiopyloric valve      |          |   |         | 0.2236  |
|    | ZO, zygocardiac ossicle      | LcO, lateral cardiac ossicle |          |   |         | 0.2266  |
|    | LcO, lateral cardiac ossicle | MT, medial tooth             |          |   |         | 0.0598  |
|    | ZO, zygocardiac ossicle      | MT, medial tooth             |          |   |         | 0.0266* |
|    | PtO, pterocardiac ossicle    | MT, medial tooth             |          |   |         | 0.0102* |
|    | LT, lateral tooth            | CV, cardiopyloric valve      |          |   |         | 0.0041* |
|    | M, membrane                  | CV, cardiopyloric valve      |          |   |         | <.0001* |
|    | S, setae                     | CV, cardiopyloric valve      |          |   |         | <.0001* |
|    | M, membrane                  | AT, accessory tooth          |          |   |         | <.0001* |
|    | S, setae                     | AT, accessory tooth          |          |   |         | <.0001* |
|    | S, setae                     | PtO, pterocardiac ossicle    |          |   |         | <.0001* |
|    | M, membrane                  | MT, medial tooth             |          |   |         | <.0001* |
|    | M, membrane                  | LT, lateral tooth            |          |   |         | <.0001* |
|    | S, setae                     | MT, medial tooth             |          |   |         | <.0001* |
|    | S, setae                     | LT, lateral tooth            |          |   |         | <.0001* |

**Supplementary Table 3.** Correlation coefficients between the parameters (elemental content and mechanical properties), estimated by row-wise method. All structures and cuticle layers are pooled together.

|    | Ae     | Ca     | Cl     | F      | Fe     | H      | K      | Mg      | Na      | P      | S       | Si      | E       | Zn      |
|----|--------|--------|--------|--------|--------|--------|--------|---------|---------|--------|---------|---------|---------|---------|
| Ae | 1.0000 | 0.8674 | 0.6912 | 0.6917 | 0.6037 | 0.7883 | 0.4715 | 0.4510  | 0.0724  | 0.7433 | 0.1998  | 0.7941  | 0.7624  | 0.5565  |
| Ca | -      | 1.0000 | 0.7474 | 0.6510 | 0.6010 | 0.4689 | 0.4661 | 0.4982  | 0.0836  | 0.7745 | 0.2092  | 0.4359  | 0.4489  | 0.5023  |
| Cl | -      | -      | 1.0000 | 0.5695 | 0.4453 | 0.3192 | 0.4179 | 0.4018  | 0.0254  | 0.5631 | 0.1237  | 0.3267  | 0.3132  | 0.4330  |
| F  | -      | -      | -      | 1.0000 | 0.4703 | 0.4446 | 0.3600 | 0.5348  | -0.0479 | 0.5103 | 0.3106  | 0.3529  | 0.4188  | 0.5112  |
| Fe | -      | -      | -      | -      | 1.0000 | 0.3094 | 0.2123 | 0.2242  | 0.0353  | 0.4579 | 0.0178  | 0.3335  | 0.2759  | 0.6441  |
| H  | -      | -      | -      | -      | -      | 1.0000 | 0.1411 | -0.0902 | -0.0636 | 0.1022 | -0.3074 | 0.7953  | 0.9875  | 0.1995  |
| K  | -      | -      | -      | -      | -      | -      | 1.0000 | 0.3273  | 0.1071  | 0.5114 | 0.2525  | 0.2322  | 0.1413  | 0.3149  |
| Mg | -      | -      | -      | -      | -      | -      | -      | 1.0000  | 0.0824  | 0.4740 | 0.4134  | 0.1076  | -0.0979 | 0.4001  |
| Na | -      | -      | -      | -      | -      | -      | -      | -       | 1.0000  | 0.1269 | 0.0495  | 0.0340  | -0.0634 | -0.0113 |
| P  | -      | -      | -      | -      | -      | -      | -      | -       | -       | 1.0000 | 0.2928  | 0.3310  | 0.1238  | 0.4125  |
| S  | -      | -      | -      | -      | -      | -      | -      | -       | -       | -      | 1.0000  | -0.0166 | -0.3178 | 0.3599  |
| Si | -      | -      | -      | -      | -      | -      | -      | -       | -       | -      | -       | 1.0000  | 0.7699  | 0.3205  |
| E  | -      | -      | -      | -      | -      | -      | -      | -       | -       | -      | -       | -       | 1.0000  | 0.1737  |
| Zn | -      | -      | -      | -      | -      | -      | -      | -       | -       | -      | -       | -       | -       | 1.0000  |

**Supplementary Table 4.** Correlation coefficients between the parameters (elemental content and mechanical properties), estimated by row-wise method. The data are for the epicuticle only. All structures are pooled together.

|    | Ae     | Ca     | Cl     | F      | Fe     | H      | K      | Mg      | Na      | P       | S       | Si      | E       | Zn      |
|----|--------|--------|--------|--------|--------|--------|--------|---------|---------|---------|---------|---------|---------|---------|
| Ae | 1.0000 | 0.8466 | 0.5818 | 0.5761 | 0.6055 | 0.7446 | 0.4237 | 0.2587  | 0.0027  | 0.6529  | 0.1128  | 0.8908  | 0.7032  | 0.5032  |
| Ca | -      | 1.0000 | 0.5794 | 0.5536 | 0.5798 | 0.4993 | 0.4514 | 0.3582  | 0.0596  | 0.7563  | -0.1001 | 0.5499  | 0.4687  | 0.3919  |
| Cl | -      | -      | 1.0000 | 0.3854 | 0.3818 | 0.3224 | 0.4561 | 0.1456  | -0.0198 | 0.4713  | -0.1989 | 0.3864  | 0.3110  | 0.2504  |
| F  | -      | -      | -      | 1.0000 | 0.4525 | 0.3918 | 0.3000 | 0.4894  | -0.1443 | 0.3254  | 0.0395  | 0.3549  | 0.3374  | 0.3567  |
| Fe | -      | -      | -      | -      | 1.0000 | 0.2928 | 0.3084 | 0.1502  | 0.0349  | 0.4447  | -0.0110 | 0.4286  | 0.2419  | 0.6787  |
| H  | -      | -      | -      | -      | -      | 1.0000 | 0.1007 | -0.1371 | -0.1780 | -0.0655 | -0.3717 | 0.7757  | 0.9825  | 0.1878  |
| K  | -      | -      | -      | -      | -      | -      | 1.0000 | 0.2096  | 0.1050  | 0.5170  | 0.0788  | 0.2210  | 0.0912  | 0.3645  |
| Mg | -      | -      | -      | -      | -      | -      | -      | 1.0000  | 0.0760  | 0.2989  | 0.0437  | 0.0385  | -0.1534 | 0.1424  |
| Na | -      | -      | -      | -      | -      | -      | -      | -       | 1.0000  | 0.1246  | 0.0237  | -0.0401 | -0.1835 | -0.0509 |
| P  | -      | -      | -      | -      | -      | -      | -      | -       | -       | 1.0000  | 0.0208  | 0.3444  | -0.0373 | 0.2937  |
| S  | -      | -      | -      | -      | -      | -      | -      | -       | -       | -       | 1.0000  | -0.1660 | -0.3950 | 0.2185  |
| Si | -      | -      | -      | -      | -      | -      | -      | -       | -       | -       | -       | 1.0000  | 0.7383  | 0.4081  |
| E  | -      | -      | -      | -      | -      | -      | -      | -       | -       | -       | -       | -       | 1.0000  | 0.1408  |
| Zn | -      | -      | -      | -      | -      | -      | -      | -       | -       | -       | -       | -       | -       | 1.0000  |

**Supplementary Table 5.** Correlation coefficients between the parameters (elemental content and mechanical properties), estimated by row-wise method. The data are for the exocuticle only. All structures are pooled together.

|    | Ae     | Ca     | Cl     | F      | Fe     | H      | K       | Mg      | Na      | P       | S       | Si      | E       | Zn      |
|----|--------|--------|--------|--------|--------|--------|---------|---------|---------|---------|---------|---------|---------|---------|
| Ae | 1.0000 | 0.9282 | 0.7168 | 0.6453 | 0.7181 | 0.5052 | 0.0745  | 0.3410  | 0.0828  | 0.7509  | 0.0592  | 0.1006  | 0.5133  | 0.4878  |
| Ca | -      | 1.0000 | 0.7085 | 0.4547 | 0.6212 | 0.3347 | 0.0522  | 0.1966  | -0.0521 | 0.5843  | -0.0714 | 0.1678  | 0.3239  | 0.3479  |
| Cl | -      | -      | 1.0000 | 0.4466 | 0.5213 | 0.3733 | -0.0575 | 0.1929  | -0.1007 | 0.2983  | -0.1616 | 0.0494  | 0.3819  | 0.3372  |
| F  | -      | -      | -      | 1.0000 | 0.4801 | 0.4442 | -0.0144 | 0.2397  | -0.2081 | 0.3244  | 0.1717  | -0.1792 | 0.4596  | 0.4716  |
| Fe | -      | -      | -      | -      | 1.0000 | 0.3750 | 0.0753  | 0.3268  | -0.0494 | 0.4619  | 0.0537  | 0.0319  | 0.3656  | 0.5987  |
| H  | -      | -      | -      | -      | -      | 1.0000 | -0.0827 | -0.0779 | -0.1120 | 0.0825  | -0.3094 | 0.0079  | 0.9844  | 0.4301  |
| K  | -      | -      | -      | -      | -      | -      | 1.0000  | -0.0225 | 0.0211  | 0.1608  | -0.0110 | 0.0989  | -0.0679 | -0.0989 |
| Mg | -      | -      | -      | -      | -      | -      | -       | 1.0000  | 0.0149  | 0.2611  | 0.4180  | 0.1943  | -0.0740 | 0.3910  |
| Na | -      | -      | -      | -      | -      | -      | -       | -       | 1.0000  | -0.0117 | 0.0759  | 0.3661  | -0.0997 | -0.0275 |
| P  | -      | -      | -      | -      | -      | -      | -       | -       | -       | 1.0000  | 0.1061  | 0.1000  | 0.0948  | 0.2408  |
| S  | -      | -      | -      | -      | -      | -      | -       | -       | -       | -       | 1.0000  | -0.0580 | -0.3065 | 0.2086  |
| Si | -      | -      | -      | -      | -      | -      | -       | -       | -       | -       | -       | 1.0000  | 0.0324  | -0.0126 |
| E  | -      | -      | -      | -      | -      | -      | -       | -       | -       | -       | -       | -       | 1.0000  | 0.4579  |
| Zn | -      | -      | -      | -      | -      | -      | -       | -       | -       | -       | -       | -       | -       | 1.0000  |

**Supplementary Table 6.** Correlation coefficients between the parameters (elemental content), estimated by row-wise method. The data are for the setae only.

|    | Si     | F      | Na      | Mg      | P       | S       | Cl      | K       | Ca      | Zn      | Ae      |
|----|--------|--------|---------|---------|---------|---------|---------|---------|---------|---------|---------|
| Si | 1.0000 | 0.0000 | 0.0000  | 0.0000  | 0.0000  | 0.0000  | 0.0000  | 0.0000  | 0.0000  | 0.0000  | 0.0000  |
| F  | -      | 1.0000 | -0.0656 | 0.0764  | 0.5527  | 0.4543  | -0.2326 | -0.0499 | 0.4440  | 0.0556  | 0.7154  |
| Na | -      | -      | 1.0000  | -0.0902 | 0.1309  | -0.1337 | 0.2699  | -0.0956 | -0.1003 | -0.0574 | -0.1171 |
| Mg | -      | -      | -       | 1.0000  | -0.2867 | 0.3226  | -0.1428 | 0.2016  | 0.3348  | 0.0265  | 0.3667  |
| P  | -      | -      | -       | -       | 1.0000  | 0.2764  | -0.1907 | -0.0900 | 0.2856  | -0.0659 | 0.4568  |
| S  | -      | -      | -       | -       | -       | 1.0000  | -0.0690 | -0.1512 | 0.2933  | -0.2071 | 0.4151  |
| Cl | -      | -      | -       | -       | -       | -       | 1.0000  | -0.1514 | -0.2081 | -0.0909 | -0.1922 |
| K  | -      | -      | -       | -       | -       | -       | -       | 1.0000  | -0.1459 | 0.4781  | 0.0358  |
| Ca | -      | -      | -       | -       | -       | -       | -       | -       | 1.0000  | -0.2439 | 0.8546  |
| Zn | -      | -      | -       | -       | -       | -       | -       | -       | -       | 1.0000  | -0.0631 |
| Ae | -      | -      | -       | -       | -       | -       | -       | -       | -       | -       | 1.0000  |
